# Supplementary material
Source: PubMed Central journal article supplement (PMC1693849)
Supplement: pnas_0607025103_4.pdf [file pnas_0607025103_4.pdf]

**Table 2. Exported proteins observed in the cell wall-associated fraction of the M145 strain only identified by either two-dimensional gel electrophoresis and/or multidimensional protein identification technology**

| <b>Sco number</b>                    | <b>Method of observation</b> | <b>Tat substrate prediction</b> | <b>Product</b>                                                | <b>Putative signal peptide</b>                             |
|--------------------------------------|------------------------------|---------------------------------|---------------------------------------------------------------|------------------------------------------------------------|
| <b>Twin-arginine signal peptides</b> |                              |                                 |                                                               |                                                            |
| SCO0432                              | 2D                           | TatP                            | Probable secreted peptidase                                   | <u>MRR</u> IRLLAAISAGLALAAGAVAPVPALAS                      |
| SCO0474                              | MudPIT                       |                                 | Putative lipoprotein                                          | MEPTVRTHPT <u>RR</u> LPTALVLTAALLATGCSEQSDDGREPAA          |
| SCO1172                              | 2D                           | TatFind                         | Putative amidase (putative secreted protein)                  | MERERTAPVPT <u>RR</u> LLKGAALATVPYTLLSGTRAAQ               |
| SCO1196                              | 2D                           | TatP and TatFind                | Putative secreted protein                                     | MALT <u>RR</u> RALTTLGAALTGAVALPAGTALAS                    |
| SCO1356                              | MudPIT                       | TatFind                         | Putative iron sulfur protein (putative secreted protein)      | MTSAPFHPAAGPA <u>RR</u> TVVAAAGAAGLTAVLAACSDSDDGASGD       |
| SCO1432                              | 2D and MudPIT                | TatP and TatFind                | Putative membrane protein.                                    | MQRRTRPTRTPGGLPLMSRVEQPS <u>RR</u> ALLAAVAAAAVTGGAIPTARAAS |
| SCO1565                              | 2D and MudPIT                | TatP and TatFind                | Putative glycerophosphoryl diester phosphodiesterase          | MGTQESDERAGGGT <u>RR</u> ALLGAAVLGAGGAVLGLPGTARAA          |
| SCO1590                              | 2D                           | TatP                            | Putative secreted protein (transglycosidase)                  | MGGV <u>SR</u> RAFTVAALSAFTLVPEASAA                        |
| SCO1639                              | 2D and MudPIT                | TatFind                         | Putative secreted peptidyl-prolyl cis-trans isomerase protein | <u>MRR</u> RSLLIAVPTGLVTLAACGSDSDSGSSNASESPPDASATSAA       |

|          |               |                  |                                                                                              |                                                                         |
|----------|---------------|------------------|----------------------------------------------------------------------------------------------|-------------------------------------------------------------------------|
| SCO1824  | MudPIT        |                  | Secreted subtilisin-like protease                                                            | MTAPLSRH <b>RR</b> ALAIPAGLAVAASLAF LPGTPAAATPAAEAA                     |
| SCO1906  | 2D            |                  | Putative secreted protein (phoX phosphatase)                                                 | MSL <b>T</b> <b>RR</b> DFAGRSALTGAGVVLGASV GALATAPNALAS                 |
| SCO1948  | 2D            |                  | Putative zinc-binding carboxypeptidase                                                       | M <b>RR</b> RARSILAVGALLIGGASFAP IAQAQ                                  |
| SCO2068  | 2D and MudPIT | TatP and TatFind | Putative secreted alkaline phosphatase                                                       | MTSRHRASENSRTPS <b>RR</b> TVVKAAAAGAVLAA PLAAALPAGAADAAP                |
| SCO2226  | 2D            |                  | Putative bi-functional protein (secreted alpha-amylase/dextrinase)                           | MPATRRTARV <b>RR</b> VAAVTVTALAAALLPPLAARAD                             |
| SCO2286* | 2D            |                  | Putative alkaline phosphatase                                                                | MTPANHQAPTSAPSPAPSQSSHAPELRAAARSLG <b>RRR</b> FLVTGAAAALAFAVNLPAAGTASAA |
| SCO2383  | MudPIT        |                  | Putative secreted protein (PF00652 Ricin B lectin)                                           | MRLRRPRRPSDGPPGRSGA <b>RR</b> LRVASAPLIPLTVIGAVVAGLIGPEPPSDG PLGTSAVAD  |
| SCO2637  | MudPIT        |                  | Putative serine protease (pfam00082, Peptidase_S8, Subtilase family)                         | MTNSPQREPIPGA <b>RR</b> AARLALATGLAAALAAVGPVPVALAA                      |
| SCO2758  | 2D            | TatP and TatFind | Beta-N-acetylglucosaminidase (putative secreted protein)                                     | MHHSSTAGTGSTAQPS <b>RR</b> SVLTATAVVTAALAAGGGTAYAD                      |
| SCO2780† | 2D and MudPIT | TatFind          | Putative secreted protein (cd01146, FhuD, Fe <sup>3+</sup> -siderophore binding domain FhuD) | MSHASATHPT <b>RR</b> GILAAGGALGLGAVLAAACGDGDGKSDGA                      |

|                      |               |                   |                                                                       |                                                                                                 |
|----------------------|---------------|-------------------|-----------------------------------------------------------------------|-------------------------------------------------------------------------------------------------|
| SCO2786              | 2D            |                   | Beta-N-acetylhexosaminidase (Transglycosidase)                        | MRPH <u>RR</u> HHRTTPRITRLLGSLLLVAAVGAMTTGAAPVRKAAAE                                            |
| SCO2821              | 2D            |                   | Putative secreted pectate lyase                                       | <u>MRRP</u> VALRLQAALGTLALAAAAGVVLTMPAAAAA                                                      |
| SCO3456              | MudPIT        |                   | Putative secreted protein (ABC transporter substrate binding protein) | MRHS <u>GRR</u> VKRATVLAAGAAVAGLLTAACSSPDTTGV                                                   |
| SCO3484              | 2D            | TatP and TatFind  | Putative secreted sugar-binding protein                               | MTKPVVPSGVS <u>RRG</u> FLGSLGVAGVLLAACSGGGNSSQGS                                                |
| SCO3790              | 2D            | #TatP and TatFind | Conserved hypothetical protein of PhoX type                           | MRKLLPLIGTPSGSHPGGRSAMTCRFRCGDACFHEVPNTSSNEYVGDVIAGALS <u>RRS</u> MMRAAAVVTVAAAGAGAVGVAGAPSAQAA |
| SCO4142 <sup>†</sup> | 2D            |                   | Phosphate-binding protein precursor                                   | MN <u>RR</u> ALALGALAVSGALALTACGSDDTGGNSGSDSSSAAAN                                              |
| SCO4152              | 2D and MudPIT |                   | Putative secreted 5'-nucleotidase                                     | MPVTAQPHQPRRR <u>RR</u> TSRLLVVAATVVVTAGVLAALPASASAG                                            |
| SCO4672              | 2D and MudPIT | TatP and TatFind  | Putative secreted protein                                             | MHTS <u>RRG</u> VLAFAASAATVPFGGAAAASPARATATAASAVDPAAASAA                                        |
| SCO4884              | 2D and MudPIT |                   | Putative lipoprotein                                                  | <u>MRR</u> TSRLIRVAVGVASLALAATACGGTSGESGD                                                       |
| SCO4885              | 2D and MudPIT |                   | Putative lipoprotein                                                  | <u>MRR</u> ISRITVAGAATASLALALAACGGTSTDSGSE                                                      |
| SCO5461              | 2D            |                   | Putative secreted protein (ADP ribosylation)                          | MITSLR <u>RR</u> TAAAVLSLSAVLATTAAATAPGAAPAPSAAPAKAA                                            |
| SCO6009              | 2D            |                   | Solute-binding protein                                                | MNTRM <u>RR</u> AAVAVATTAMAVSLAACGSAK                                                           |
| SCO6052              | 2D            | TatP and TatFind  | Putative membrane protein                                             | MSTSRNAAT <u>RR</u> QVLARTGALGAGIAFTGALSELFAGTAAAQ                                              |

|                                          |               |                   |                                                                  |                                                                            |
|------------------------------------------|---------------|-------------------|------------------------------------------------------------------|----------------------------------------------------------------------------|
| SCO6198 <sup>†</sup>                     | MudPIT        | TatP and TatFind  | Putative secreted protein                                        | MDTTYWS <u>RRR</u> VLTVLGAATAATSIPLAAPSRALAA                               |
| SCO6272*                                 | 2D            | TatP and TatFind  | Putative secreted FAD-binding protein                            | MTEVS <u>RR</u> KLMKGA AVSGGALALPALGAPPATAAPAAGPEDLPGPAAAAAG               |
| SCO6281                                  | 2D and MudPIT | TatP and TatFind  | Putative FAD-binding protein                                     | MSAIS <u>RRR</u> FIRHGAVAGGAAVALPALGGWAGEAFAA                              |
| SCO6418                                  | 2D and MudPIT | TatP and TatFind  | Hypothetical protein (pectin lyase like)                         | MD <u>RR</u> ALMLATGGLLGAAGAAQLTAAPSAVAA                                   |
| SCO6457                                  | 2D            | TatP and TatFind  | Putative beta-galactosidase (Galactose mutarotase-like)          | MPHSPVSPAESPAPQPGRPRPVVS <u>RRR</u> LLEGGA AVLGALALSASPLTAQAA<br>VRRAAAD   |
| SCO6580                                  | 2D            | #TatP and TatFind | Hypothetical protein (Xylose isomerase-like)                     | MTPFTDSSRTDAGTDPADGPGESLRRALGVN <u>RRR</u> RFLSTCTAVAAGAVAAPVFGA<br>SPALAH |
| SCO6594                                  | MudPIT        | TatP and TatFind  | Putative secreted protein                                        | MPSSPTPSPTPSGAPEPSGV <u>RRR</u> SLLA AAAA APVLASLAGAGTAAAD                 |
| SCO6644                                  | MudPIT        |                   | Putative solute-binding lipoprotein                              | MRS <u>RR</u> PRL LAPFL VPLMAGCFASGGGDDSASGD                               |
| SCO6691                                  | 2D            | TatP and TatFind  | Putative phospholipase C                                         | MAEVN <u>RRR</u> RFLQLAGATTAFSALSASIDRAAAL                                 |
| SCO7399                                  | 2D            |                   | Possible binding-protein-dependent transport lipoprotein (FhuD). | <u>MR</u> RLLLTAAATTAALTLAACGTTEPAAD                                       |
| SCO7631                                  | 2D            | TatP              | Putative secreted protein                                        | MSTEEQSSGRRHPD <u>RR</u> VLLRAAVAVPAAGAAVAGTAAVPAQAADAA                    |
| <b>Non twin-arginine signal peptides</b> |               |                   |                                                                  |                                                                            |
| SCO0930                                  | MudPIT        |                   | Putative lipoprotein                                             | MKTSWRSASLVAGAAALLALTACGQDGGGPTGSQNVGATAA                                  |
| SCO1396                                  | MudPIT        |                   | Putative D-alanyl-D-alanine dipeptidase                          | MTRLSAALRGLATTFAALLAVTAVPAASAPATAQAR                                       |

|                      |               |  |                                                       |                                        |
|----------------------|---------------|--|-------------------------------------------------------|----------------------------------------|
|                      |               |  | (putative secreted protein)                           |                                        |
| SCO1968 <sup>†</sup> | 2D and MudPIT |  | Putative secreted hydrolase                           | MHVRAVAVTTTALLGVALTAPLSHARAD           |
| SCO3967              | MudPIT        |  | Conserved hypothetical membrane protein               | MKASRIAAVGAVSGIAVLALSAPAFAHVSVQPEGAAAK |
| SCO4010              | MudPIT        |  | Putative secreted protein (subtilisin inhibitor)      | MFQVTRTPAARLLGAAALSAAALASVCAAPSAAVAGAG |
| SCO5074              | 2D and MudPIT |  | Putative dehydratase                                  | MTSSLHHAIRLTTASAIALGGLVTLG TSAHAA      |
| SCO6738              | 2D            |  | Putative carboxypeptidase (putative secreted protein) | MNRLRTLATTAALAASLLVPSLLTAPAHAD         |

Proteins are listed by SCO number and the signal peptide sequences are given in the right column. Twin-arginine dipeptides, where present, are shown in bold underline. Where multiple arginine dipeptides are present, only the most plausible one is marked. Method of observation indicates which technique was used to identify a particular protein (2D is two-dimensional gel electrophoresis; MudPIT is multidimensional protein identification technology). The column annotated 'Tat substrate prediction' indicates whether a particular protein has been identified as a putative Tat substrate by either of the two prediction programs TatFind 1.4 or TatP1.0 [www.signalfind.org](http://www.signalfind.org) and [www.cbs.dtu.dk/services/TatP-1.0/](http://www.cbs.dtu.dk/services/TatP-1.0/), respectively.

There is some ambiguity about the assigned start codons for SCO3790 and SCO6580. For each of these proteins there is an alternative GTG start codon within the predicted signal peptide coding sequences. These are shown as valine residues that are highlighted in bold underline. Signal peptides initiating at these alternative start codons were tested in the agarase export assay (Fig 3) and in each case shown to mediate higher levels of agarase export than the full length signal peptides.

\*These signal peptides have been shown to mediate Tat-dependent export when fused to the mature sequence of *S. lividans* xylanase C (Li H, Jacques PE, Ghinet MG, Brzezinski R, Morosoli R (2005) *Microbiology* 151: 2189-2198).

† These proteins have also been identified in the extracellular fraction of *S. coelicolor* grown in liquid medium (Kim DW, Chater K, Lee KJ, Hesketh, A (2005) *J Bacteriol* 187: 2957-2966).

#These proteins are only detected by TatP and TatFind when truncated *in silico* at the N-terminus to the underlined residue.
