# Supplementary material
Source: PubMed Central journal article supplement (PMC1693849)
Supplement: pnas_0607025103_5.pdf [file pnas_0607025103_5.pdf]

**Table 3. Cytoplasmic proteins observed in the extracellular fractions of *S. coelicolor* identified by either two-dimensional gel electrophoresis and/or multidimensional protein identification technology**

| SCO number           | Method of observation                  | Annotation                                             |
|----------------------|----------------------------------------|--------------------------------------------------------|
| SCO0256              | MudPIT (Mutual)                        | Putative short chain oxidoreductase                    |
| SCO0168              | 2D                                     | Possible regulator protein                             |
| SCO0179              | 2D                                     | Putative zinc-containing dehydrogenase                 |
| SCO0180              | 2D                                     | Conserved hypothetical protein SCJ1.29c                |
| SCO0199              | 2D                                     | Putative alcohol dehydrogenase                         |
| SCO0204              | 2D                                     | Putative luxR family two-component response regulator  |
| SCO0260              | 2D and MudPIT ( $\Delta$ <i>tatC</i> ) | Conserved hypothetical protein                         |
| SCO0379 <sup>†</sup> | 2D and MudPIT (Mutual)                 | Catalase (EC 1.11.1.6)                                 |
| SCO0400              | 2D                                     | Putative epimerase                                     |
| SCO0492              | MudPIT ( $\Delta$ <i>tatC</i> )        | Putative peptide synthetase                            |
| SCO0499 <sup>†</sup> | MudPIT ( $\Delta$ <i>tatC</i> )        | Putative formyltransferase                             |
| SCO0525              | MudPIT ( $\Delta$ <i>tatC</i> )        | Conserved hypothetical protein SCF11.05                |
| SCO0527              | 2D and MudPIT (mutual)                 | Cold shock protein                                     |
| SCO0570              | MudPIT ( $\Delta$ <i>tatC</i> )        | 50S ribosomal protein L33                              |
| SCO0592              | 2D                                     | Hypothetical protein SCF55.16c                         |
| SCO0596              | 2D                                     | Putative DNA-binding protein                           |
| SCO0597              | 2D                                     | Conserved hypothetical protein SCF55.21c               |
| SCO0640              | MudPIT ( $\Delta$ <i>tatC</i> )        | Conserved hypothetical protein SCF56.24c               |
| SCO0641              | MudPIT (mutual)                        | Tellurium resistance protein                           |
| SCO0682              | MudPIT (M145)                          | Hypothetical protein SCF15.03c                         |
| SCO0714              | 2D                                     | Putative oxidoreductase                                |
| SCO0740              | 2D                                     | Putative hydrolase                                     |
| SCO0741              | 2D                                     | Putative oxidoreductase                                |
| SCO0788              | MudPIT (mutual)                        | Hypothetical protein 3SCF60.20c                        |
| SCO0797              | 2D                                     | Putative integral membrane protein.                    |
| SCO0852              | 2D and MudPIT ( $\Delta$ <i>tatC</i> ) | Putative aldolase                                      |
| SCO0870              | MudPIT (M145)                          | Putative two-component system response regulator       |
| SCO0884              | MudPIT ( $\Delta$ <i>tatC</i> )        | Probable oxidoreductase                                |
| SCO0885              | MudPIT ( $\Delta$ <i>tatC</i> )        | Thioredoxin                                            |
| SCO0906              | 2D                                     | Hypothetical protein SCM1.39c                          |
| SCO0945              | 2D                                     | Putative formamidopyrimidine-DNA glycosylase           |
| SCO0975              | MudPIT (M145)                          | 6-phosphogluconate 1-dehydrogenase                     |
| SCO0977              | MudPIT (mutual)                        | Conserved hypothetical protein                         |
| SCO0999              | MudPIT (mutual)                        | Superoxide dismutase                                   |
| SCO1081              | 2D and MudPIT ( $\Delta$ <i>tatC</i> ) | Putative electron transfer flavoprotein, alpha subunit |
| SCO1082              | MudPIT ( $\Delta$ <i>tatC</i> )        | Putative electron transfer flavoprotein, beta subunit  |
| SCO1085              | MudPIT ( $\Delta$ <i>tatC</i> )        | Putative acyltransferase                               |
| SCO1116              | MudPIT (mutual)                        | Hypothetical protein                                   |
| SCO1123              | 2D and MudPIT ( $\Delta$ <i>tatC</i> ) | Hypothetical protein 2SCG38.16                         |
| SCO1198              | MudPIT ( $\Delta$ <i>tatC</i> )        | Putative acyl-CoA dehydrogenase                        |
| SCO1199              | MudPIT ( $\Delta$ <i>tatC</i> )        | Putative oxidoreductase                                |

|                      |                        |                                                            |
|----------------------|------------------------|------------------------------------------------------------|
| SCO1337              | MudPIT (M145)          | Putative oxidoreductase                                    |
| SCO1384              | 2D and MudPIT (mutual) | Conserved hypothetical protein                             |
| SCO1390              | MudPIT (mutual)        | Putative PTS system sugar phosphotransferase component IIA |
| SCO1391              | MudPIT (M145)          | Phosphoenolpyruvate-protein phosphotransferase             |
| SCO1438              | 2D                     | ATP phosphoribosyltransferase                              |
| SCO1453              | MudPIT ( $\Delta$ atC) | Hypothetical protein                                       |
| SCO1462              | MudPIT (M145)          | Hypothetical protein SCL6.19c                              |
| SCO1476              | 2D                     | S-adenosylmethionine synthetase                            |
| SCO1480              | MudPIT (mutual)        | Conserved hypothetical protein                             |
| SCO1489              | 2D                     | Putative DNA-binding protein                               |
| SCO1496              | 2D                     | Chorismate synthase                                        |
| SCO1505              | MudPIT (mutual)        | 30S ribosomal protein S4                                   |
| SCO1508              | 2D                     | Histidyl tRNA synthetase                                   |
| SCO1569              | MudPIT ( $\Delta$ atC) | Putative oxidoreductase                                    |
| SCO1594              | MudPIT (mutual)        | Putative phenylalanyl-tRNA synthetase beta chain           |
| SCO1598              | MudPIT (M145)          | 50S ribosomal protein L20                                  |
| SCO1600              | MudPIT (M145)          | Putative translation initiation factor IF-3                |
| SCO1620              | MudPIT ( $\Delta$ atC) | Glycine betaine transport system permease protein          |
| SCO1623              | MudPIT (M145)          | Conserved hypothetical protein SCI41.06                    |
| SCO1626              | MudPIT (mutual)        | Putative cytochrome P450                                   |
| SCO1628              | MudPIT (M145)          | Conserved hypothetical protein                             |
| SCO1643              | MudPIT (mutual)        | 20S proteasome alpha-subunit                               |
| SCO1644              | MudPIT (mutual)        | 20S proteasome beta-subunit precursor                      |
| SCO1646              | MudPIT (mutual)        | Hypothetical protein                                       |
| SCO1651              | MudPIT (M145)          | Conserved hypothetical protein SCI41.34c                   |
| SCO1654              | 2D                     | Putative two-component response regulator                  |
| SCO1766              | MudPIT (M145)          | Putative glycohydrolase                                    |
| SCO1767              | 2D                     | Putative DNA hydrolase                                     |
| SCO1773              | 2D                     | Putative L-alanine dehydrogenase                           |
| SCO1775              | 2D                     | Conserved hypothetical protein                             |
| SCO1788              | MudPIT (mutual)        | Conserved hypothetical protein                             |
| SCO1794              | 2D and MudPIT (M145)   | Conserved hypothetical protein                             |
| SCO1809              | MudPIT (mutual)        | Conserved hypothetical protein                             |
| SCO1839              | MudPIT (mutual)        | Putative transcriptional regulator                         |
| SCO1870              | MudPIT (M145)          | Hypothetical protein SCI39.17c                             |
| SCO1921              | MudPIT (mutual)        | Putative aminotransferase                                  |
| SCO1922              | MudPIT (mutual)        | Putative ABC transporter ATP-binding subunit               |
| SCO1923              | MudPIT (mutual)        | Putative dioxygenase ferredoxin subunit                    |
| SCO1935              | 2D                     | Transketolase A                                            |
| SCO1936              | MudPIT (mutual)        | Putative transaldolase                                     |
| SCO1937              | 2D                     | Putative glucose-6-phosphate 1-dehydrogenase               |
| SCO1945 <sup>†</sup> | 2D and MudPIT (mutual) | Triosephosphate isomerase                                  |
| SCO1946              | 2D and MudPIT (mutual) | Phosphoglycerate kinase                                    |
| SCO1947 <sup>†</sup> | 2D and MudPIT (mutual) | Glyceraldehyde-3-phosphate dehydrogenase                   |
| SCO1998              | 2D and MudPIT (mutual) | 30S ribosomal protein S1                                   |

|                      |                          |                                                                         |
|----------------------|--------------------------|-------------------------------------------------------------------------|
| SCO2011              | MudPIT (M145)            | Putative branched chain amino acid transport ATP-binding protein        |
| SCO2012              | MudPIT (mutual)          | Putative branched chain amino acid transport ATP-binding protein        |
| SCO2039              | MudPIT (M145)            | Indoleglycerol phosphate synthase                                       |
| SCO2045              | 2D                       | Conserved hypothetical protein                                          |
| SCO2050              | MudPIT (M145)            | Phosphoribosylformimino-5-aminoimidazole carboxamide ribotide isomerase |
| SCO2077              | MudPIT ( $\Delta tatC$ ) | Hypothetical protein                                                    |
| SCO2105              | MudPIT ( $\Delta tatC$ ) | Putative transcriptional regulatory protein                             |
| SCO2126              | MudPIT ( $\Delta tatC$ ) | Glucokinase                                                             |
| SCO2149              | MudPIT (M145)            | Rieske iron-sulfur protein                                              |
| SCO2167              | MudPIT ( $\Delta tatC$ ) | Hypothetical protein                                                    |
| SCO2168              | MudPIT ( $\Delta tatC$ ) | Hypothetical protein                                                    |
| SCO2180 <sup>†</sup> | 2D and MudPIT (mutual)   | Putative dihydrolipoamide dehydrogenase                                 |
| SCO2181              | 2D and MudPIT (M145)     | Putative dihydrolipoamide succinyltransferase                           |
| SCO2183              | MudPIT ( $\Delta tatC$ ) | Putative pyruvate dehydrogenase E1 component                            |
| SCO2198 <sup>†</sup> | 2D and MudPIT (mutual)   | Glutamine synthetase I                                                  |
| SCO2206              | MudPIT (M145)            | ArsC, arsenate reductase                                                |
| SCO2210              | 2D and MudPIT (M145)     | Glutamine synthetase                                                    |
| SCO2262              | 2D and MudPIT (M145)     | Putative oxidoreductase                                                 |
| SCO2265              | MudPIT ( $\Delta tatC$ ) | Hypothetical protein SCC75A.11c.                                        |
| SCO2339              | MudPIT (mutual)          | Hypothetical protein                                                    |
| SCO2367              | 2D and MudPIT (mutual)   | Conserved hypothetical protein                                          |
| SCO2368              | 2D and MudPIT (mutual)   | Conserved hypothetical protein                                          |
| SCO2369              | MudPIT ( $\Delta tatC$ ) | Putative thiol-specific antioxidant protein                             |
| SCO2370              | MudPIT (mutual)          | Conserved hypothetical protein                                          |
| SCO2380              | MudPIT ( $\Delta tatC$ ) | Conserved hypothetical protein SC4A7.08                                 |
| SCO2382              | MudPIT ( $\Delta tatC$ ) | Hypothetical protein SC4A7.10                                           |
| SCO2389              | MudPIT (mutual)          | Acyl carrier protein                                                    |
| SCO2394              | 2D and MudPIT (M145)     | Putative secreted protein                                               |
| SCO2407              | 2D                       | Putative aldose 1-epimerase                                             |
| SCO2469              | MudPIT (mutual)          | Putative reductase                                                      |
| SCO2504              | 2D                       | Glycyl-tRNA synthetase                                                  |
| SCO2506              | MudPIT ( $\Delta tatC$ ) | Putative metal transport ABC transporter                                |
| SCO2529              | 2D                       | Putative metalloprotease.                                               |
| SCO2548              | MudPIT (mutual)          | Putative Hit-family protein.                                            |
| SCO2554              | MudPIT (M145)            | DnaJ protein.                                                           |
| SCO2576              | MudPIT ( $\Delta tatC$ ) | Phosphoglycerate mutase                                                 |
| SCO2582              | MudPIT (mutual)          | Conserved hypothetical protein SCC123.20.                               |
| SCO2596              | MudPIT (mutual)          | 50S ribosomal protein L27                                               |
| SCO2597              | MudPIT (M145)            | Ribosomal protein L21                                                   |
| SCO2612              | 2D and MudPIT (M145)     | Nucleoside diphosphate kinase                                           |
| SCO2627              | MudPIT ( $\Delta tatC$ ) | Putative sugar-phosphate isomerase                                      |
| SCO2633              | 2D and MudPIT (mutual)   | Superoxide dismutase [Fe-Zn] (EC 1.15.1.1)                              |
| SCO2634              | MudPIT (mutual)          | Conserved hypothetical protein SC8E4A.04c                               |
| SCO2635              | MudPIT ( $\Delta tatC$ ) | Putative aminopeptidase                                                 |

|                      |                                |                                                        |
|----------------------|--------------------------------|--------------------------------------------------------|
| SCO2643 <sup>†</sup> | MudPIT (mutual)                | Aminopeptidase N                                       |
| SCO2696              | MudPIT (M145)                  | Putative 2-hydroxyacid-family dehydrogenase            |
| SCO2736 <sup>†</sup> | MudPIT (mutual)                | Citrate synthase.                                      |
| SCO2822              | 2D and MudPIT (M145)           | Putative decarboxylase                                 |
| SCO2849              | MudPIT (M145)                  | Conserved hypothetical protein SCE20.23.               |
| SCO2901              | 2D and MudPIT (mutual)         | Hypothetical protein                                   |
| SCO2902              | 2D                             | Conserved hypothetical protein                         |
| SCO2904              | 2D and MudPIT (mutual)         | Putative ribonuclease PH                               |
| SCO2905              | MudPIT (mutual)                | Hypothetical protein                                   |
| SCO2911              | MudPIT (mutual)                | Conserved hypothetical protein                         |
| SCO2950              | MudPIT (mutual)                | DNA-binding protein Hu (hs1)                           |
| SCO2951              | 2D and MudPIT (mutual)         | Putative malate oxidoreductase                         |
| SCO2999              | MudPIT ( <i>ΔtatC</i> )        | Conserved hypothetical protein                         |
| SCO3023              | MudPIT (M145)                  | Adenosylhomocysteinase                                 |
| SCO3027              | MudPIT (mutual)                | Hypothetical protein SCD84.08c                         |
| SCO3096 <sup>†</sup> | 2D and MudPIT (mutual)         | Enolase                                                |
| SCO3122              | MudPIT (M145)                  | Putative nucleotidyltransferase                        |
| SCO3123 <sup>†</sup> | MudPIT ( <i>ΔtatC</i> )        | Ribose-phosphate pyrophosphokinase                     |
| SCO3124              | MudPIT (mutual)                | Ribosomal L25p family protein                          |
| SCO3127              | MudPIT (mutual)                | Phosphoenolpyruvate carboxylase                        |
| SCO3182              | MudPIT (M145)                  | UTP-glucose-1-phosphate uridylyltransferase            |
| SCO3187              | MudPIT ( <i>ΔtatC</i> )        | Conserved hypothetical protein SCE22.04                |
| SCO3303              | MudPIT ( <i>ΔtatC</i> )        | Putative lysyl-tRNA synthetase                         |
| SCO3304              | MudPIT ( <i>ΔtatC</i> )        | Putative arginyl-tRNA synthetase                       |
| SCO3328              | MudPIT (M145)                  | Hypothetical protein                                   |
| SCO3337              | 2D                             | Pyrroline-5-carboxylate reductase                      |
| SCO3345              | 2D                             | Dihydroxy acid dehydratase                             |
| SCO3373              | MudPIT (M145)                  | Putative Clp-family ATP-binding protease               |
| SCO3407              | 2D                             | Conserved hypothetical protein                         |
| SCO3409              | MudPIT (mutual)                | Putative inorganic pyrophosphatase                     |
| SCO3425              | MudPIT (M145)                  | Putative 30S ribosomal protein S18                     |
| SCO3427              | MudPIT (M145)                  | Putative 50S ribosomal protein L31                     |
| SCO3429              | MudPIT (mutual)                | Putative 50S ribosomal protein L28                     |
| SCO3438              | MudPIT (M145)                  | Hypothetical protein                                   |
| SCO3443              | 2D                             | Putative pyridine nucleotide-disulphide oxidoreductase |
| SCO3463              | MudPIT (M145)                  | Putative phosphorylase                                 |
| SCO3490              | 2D                             | Transposase                                            |
| SCO3549              | MudPIT (M145)                  | Putative anti-sigma factor antagonist                  |
| SCO3549              | 2D and MudPIT ( <i>ΔtatC</i> ) | putative anti-sigma factor antagonist                  |
| SCO3569              | MudPIT (mutual)                | Putative endonuclease                                  |
| SCO3571              | 2D                             | Putative transcriptional regulator                     |
| SCO3575              | MudPIT (M145)                  | Conserved hypothetical protein                         |
| SCO3617              | MudPIT (M145)                  | Hypothetical protein                                   |
| SCO3622              | 2D                             | Putative aminotransferase                              |
| SCO3629              | 2D and MudPIT (M145)           | Adenylosuccinate synthetase                            |
| SCO3647              | 2D and MudPIT (M145)           | Conserved hypothetical protein                         |
| SCO3649 <sup>†</sup> | 2D and MudPIT (mutual)         | Putative fructose 1,6-bisphosphate aldolase            |
| SCO3659              | MudPIT ( <i>ΔtatC</i> )        | Hypothetical protein                                   |
| SCO3661              | MudPIT (M145)                  | ATP-dependent protease ATP-                            |

|                      |                                        |                                                        |
|----------------------|----------------------------------------|--------------------------------------------------------|
|                      |                                        | binding subunit                                        |
| SCO3671              | MudPIT (mutual)                        | Heat shock protein 70                                  |
| SCO3731              | MudPIT (mutual)                        | Cold-shock protein                                     |
| SCO3734              | MudPIT (M145)                          | Hypothetical protein                                   |
| SCO3748              | MudPIT (mutual)                        | Cold shock protein                                     |
| SCO3767              | 2D and MudPIT (mutual)                 | Conserved hypothetical protein                         |
| SCO3790 <sup>†</sup> | 2D                                     | Conserved hypothetical protein                         |
| SCO3792 <sup>†</sup> | MudPIT (mutual)                        | Putative methionyl tRNA synthetase                     |
| SCO3793              | MudPIT (M145)                          | Conserved hypothetical protein                         |
| SCO3823              | 2D                                     | Putative quinone oxidoreductase                        |
| SCO3834              | MudPIT (mutual)                        | Putative 3-Hydroxyacyl-CoA dehydrogenase               |
| SCO3877              | MudPIT ( $\Delta$ <i>tatC</i> )        | Putative 6-phosphogluconate dehydrogenase              |
| SCO3878              | MudPIT (mutual)                        | DNA polymerase III, beta chain                         |
| SCO3889              | MudPIT (mutual)                        | Thioredoxin                                            |
| SCO3890              | MudPIT (M145)                          | Thioredoxin reductase (NADPH)                          |
| SCO3899              | 2D and MudPIT (M145)                   | Hypothetical protein                                   |
| SCO3906              | MudPIT (mutual)                        | Putative 30S ribosomal protein S6                      |
| SCO3907              | 2D and MudPIT (M145)                   | Putative single-strand DNA-binding protein             |
| SCO3909              | MudPIT (mutual)                        | 50S ribosomal protein L9                               |
| SCO3913              | 2D                                     | Conserved hypothetical protein                         |
| SCO3917              | MudPIT (M145)                          | Conserved hypothetical protein                         |
| SCO3920              | MudPIT ( $\Delta$ <i>tatC</i> )        | Putative cystathionine/methionine gamma-synthase/lyase |
| SCO3956              | MudPIT ( $\Delta$ <i>tatC</i> )        | Putative ABC transporter ATP-binding protein           |
| SCO3974              | MudPIT ( $\Delta$ <i>tatC</i> )        | Hypothetical protein                                   |
| SCO4036              | MudPIT (mutual)                        | Hypothetical protein                                   |
| SCO4039              | MudPIT (mutual)                        | Hypothetical protein 2SCD60.05c                        |
| SCO4041              | MudPIT (M145)                          | Putative uracil phosphoribosyltransferase              |
| SCO4043              | MudPIT ( $\Delta$ <i>tatC</i> )        | Conserved hypothetical protein                         |
| SCO4048              | MudPIT (M145)                          | Conserved hypothetical protein                         |
| SCO4068              | 2D                                     | Phosphoribosylamine-glycine ligase (EC 6.3.4.13)       |
| SCO4086              | MudPIT (M145)                          | Amidophosphoribosyltransferase                         |
| SCO4087              | 2D and MudPIT (mutual)                 | Phosphoribosylformylglycinamide cyclo-ligase           |
| SCO4089 <sup>†</sup> | MudPIT ( $\Delta$ <i>tatC</i> )        | Valine dehydrogenase (EC 1.4.1.-)                      |
| SCO4091              | MudPIT (mutual)                        | Putative DNA-binding protein                           |
| SCO4109              | 2D and MudPIT (mutual)                 | Putative oxidoreductase                                |
| SCO4164              | MudPIT (mutual)                        | Putative thiosulfate sulfurtransferase                 |
| SCO4165              | MudPIT (mutual)                        | Conserved hypothetical protein                         |
| SCO4173              | MudPIT ( $\Delta$ <i>tatC</i> )        | Hypothetical protein SCD66.10c                         |
| SCO4175              | 2D and MudPIT ( $\Delta$ <i>tatC</i> ) | Hypothetical protein SCD66.12c                         |
| SCO4199              | MudPIT (M145)                          | Hypothetical protein                                   |
| SCO4228              | 2D                                     | Putative phosphate transport system regulator          |
| SCO4240              | 2D                                     | ABC transporter ATP-binding protein                    |
| SCO4246              | MudPIT (M145)                          | Hypothetical protein SCD8A.19c                         |
| SCO4277              | 2D and MudPIT (mutual)                 | Putative tellurium resistance protein                  |
| SCO4294              | MudPIT ( $\Delta$ <i>tatC</i> )        | Conserved hypothetical protein                         |
| SCO4295              | MudPIT (M145)                          | Cold shock protein                                     |
| SCO4296              | 2D and MudPIT (mutual)                 | Chaperonin 2                                           |
| SCO4366 <sup>†</sup> | 2D and MudPIT (M145)                   | Putative phosphoserine                                 |

|                      |                         |                                                    |
|----------------------|-------------------------|----------------------------------------------------|
|                      |                         | Aminotransferase                                   |
| SCO4411              | MudPIT (mutual)         | Putative calcium binding protein                   |
| SCO4441              | 2D                      | Putative DNA-binding protein                       |
| SCO4505              | 2D and MudPIT (mutual)  | Cold shock protein                                 |
| SCO4509              | MudPIT (mutual)         | Hypothetical protein SCD35.16                      |
| SCO4580              | MudPIT (mutual)         | Putative fumarylacetoacetase                       |
| SCO4614              | 2D and MudPIT (mutual)  | Conserved hypothetical protein                     |
| SCO4645              | MudPIT (mutual)         | Aspartate aminotransferase                         |
| SCO4649              | MudPIT (mutual)         | 50S ribosomal protein L1                           |
| SCO4652              | 2D and MudPIT (mutual)  | 50S ribosomal protein L10                          |
| SCO4653              | MudPIT (mutual)         | 50S ribosomal protein L7/L12                       |
| SCO4655              | MudPIT ( <i>ΔtatC</i> ) | DNA-directed RNA polymerase beta' chain (fragment) |
| SCO4659              | MudPIT (mutual)         | 30S ribosomal protein S12                          |
| SCO4660              | MudPIT (mutual)         | 30S ribosomal protein S7                           |
| SCO4662              | 2D and MudPIT (mutual)  | Elongation factor TU-1                             |
| SCO4675              | MudPIT (mutual)         | Conserved hypothetical protein SCD40A.21c          |
| SCO4687              | MudPIT (mutual)         | Hypothetical protein SCD31.12c                     |
| SCO4701              | MudPIT (M145)           | 30S ribosomal protein S10                          |
| SCO4702              | MudPIT (mutual)         | 50S ribosomal protein L3                           |
| SCO4703              | 2D and MudPIT (mutual)  | 50S ribosomal protein L4                           |
| SCO4704              | MudPIT (mutual)         | 50S ribosomal protein L23                          |
| SCO4705              | MudPIT (mutual)         | 50S ribosomal protein L2                           |
| SCO4706              | MudPIT (mutual)         | 30S ribosomal protein S19                          |
| SCO4707              | MudPIT (M145)           | 50S ribosomal protein L22                          |
| SCO4709              | MudPIT (M145)           | 50S ribosomal protein L16                          |
| SCO4710              | MudPIT (M145)           | 50S ribosomal protein L29                          |
| SCO4711              | MudPIT (M145)           | 30S ribosomal protein S17                          |
| SCO4713              | MudPIT (mutual)         | 50S ribosomal protein L24                          |
| SCO4714              | MudPIT (M145)           | 50S ribosomal protein L5                           |
| SCO4716              | MudPIT (mutual)         | 30S ribosomal protein S8                           |
| SCO4717              | MudPIT (mutual)         | 50S ribosomal protein L6                           |
| SCO4718              | MudPIT (mutual)         | 50S ribosomal protein L18                          |
| SCO4719              | MudPIT (mutual)         | 30S ribosomal protein S5                           |
| SCO4720              | MudPIT (mutual)         | 50S ribosomal protein L30                          |
| SCO4721              | MudPIT (mutual)         | 50S ribosomal protein L15                          |
| SCO4723              | MudPIT (M145)           | Adenylate kinase                                   |
| SCO4725              | MudPIT (mutual)         | Translational initiation factor IF1                |
| SCO4726              | MudPIT (M145)           | 50S ribosomal protein L36                          |
| SCO4727              | MudPIT (mutual)         | 30S ribosomal protein S13                          |
| SCO4729              | 2D and MudPIT (mutual)  | DNA-directed RNA polymerase alpha chain            |
| SCO4730              | MudPIT (mutual)         | 50S ribosomal protein L17                          |
| SCO4734              | MudPIT (mutual)         | 50S ribosomal protein L13                          |
| SCO4735              | MudPIT (mutual)         | 30S ribosomal protein S9                           |
| SCO4761              | 2D and MudPIT (mutual)  | 10 kD chaperonin cpn10                             |
| SCO4762              | MudPIT (mutual)         | 60 kD chaperonin cpn60                             |
| SCO4770              | 2D and MudPIT (M145)    | Inosine 5' monophosphate dehydrogenase             |
| SCO4771 <sup>†</sup> | 2D                      | Putative inosine-5'-monophosphate dehydrogenase    |
| SCO4800              | MudPIT ( <i>ΔtatC</i> ) | Isobutyryl CoA mutase, small subunit               |
| SCO4808              | MudPIT (mutual)         | Succinyl-CoA synthetase beta chain                 |
| SCO4809 <sup>†</sup> | MudPIT (mutual)         | Succinyl CoA synthetase alpha chain                |
| SCO4814              | MudPIT (M145)           | Bifunctional purine biosynthesis                   |

|                      |                         |                                                                                                      |
|----------------------|-------------------------|------------------------------------------------------------------------------------------------------|
|                      |                         | protein                                                                                              |
| SCO4824              | 2D and MudPIT (mutual)  | Bifunctional protein (methylenetetrahydrofolate dehydrogenase and methenyltetrahydrofolate cyclohydr |
| SCO4827 <sup>†</sup> | MudPIT (mutual)         | Malate dehydrogenase                                                                                 |
| SCO4855              | MudPIT (M145)           | Putative succinate dehydrogenase iron-sulfur subunit                                                 |
| SCO4856              | MudPIT ( <i>ΔtatC</i> ) | Putative succinate dehydrogenase flavoprotein subunit                                                |
| SCO4860              | MudPIT (mutual)         | Putative secreted hydrolase                                                                          |
| SCO4907              | 2D                      | Transcriptional regulatory protein                                                                   |
| SCO4921              | MudPIT (M145)           | Putative acyl-CoA carboxylase complex A subunit                                                      |
| SCO4932              | MudPIT ( <i>ΔtatC</i> ) | Histidine ammonia-lyase                                                                              |
| SCO4956              | MudPIT (mutual)         | Putative peptide methionine sulfoxide reductase                                                      |
| SCO4958 <sup>†</sup> | 2D and MudPIT (M145)    | Cystathionine gamma-synthase                                                                         |
| SCO4990              | MudPIT (M145)           | Conserved hypothetical protein                                                                       |
| SCO5031              | MudPIT (mutual)         | Alkyl hydroperoxide reductase system hypothetical protein                                            |
| SCO5042              | MudPIT ( <i>ΔtatC</i> ) | Fumarate hydratase C                                                                                 |
| SCO5059              | 2D                      | Polyphosphate glucokinase                                                                            |
| SCO5075              | 2D                      | Putative oxidoreductase                                                                              |
| SCO5077              | MudPIT (mutual)         | Hypothetical protein                                                                                 |
| SCO5079              | 2D                      | Conserved hypothetical protein                                                                       |
| SCO5101              | MudPIT (M145)           | Conserved hypothetical protein                                                                       |
| SCO5102              | MudPIT (mutual)         | Putative mutT-like protein                                                                           |
| SCO5135              | 2D and MudPIT (mutual)  | Ferredoxin                                                                                           |
| SCO5145              | MudPIT (mutual)         | Conserved hypothetical protein                                                                       |
| SCO5167              | 2D                      | Conserved hypothetical protein                                                                       |
| SCO5169              | MudPIT (mutual)         | Putative ATP-binding protein                                                                         |
| SCO5187              | 2D and MudPIT (mutual)  | Putative glutaredoxin-like protein                                                                   |
| SCO5199              | MudPIT ( <i>ΔtatC</i> ) | Conserved hypothetical protein                                                                       |
| SCO5212 <sup>†</sup> | MudPIT (mutual)         | 3-phosphoshikimate 1-carboxyvinyltransferase                                                         |
| SCO5217              | MudPIT ( <i>ΔtatC</i> ) | Anti-sigma factor                                                                                    |
| SCO5221              | 2D                      | Putative polypeptide deformylase                                                                     |
| SCO5236              | MudPIT (M145)           | Putative glucosamine phosphate isomerase                                                             |
| SCO5249              | 2D                      | Putative nucleotide-binding protein                                                                  |
| SCO5251              | 2D                      | Acetyltransferase                                                                                    |
| SCO5254              | 2D                      | Superoxide dismutase                                                                                 |
| SCO5261              | MudPIT (M145)           | Putative malate oxidoreductase                                                                       |
| SCO5262 <sup>†</sup> | MudPIT ( <i>ΔtatC</i> ) | Putative dehydrogenase                                                                               |
| SCO5281              | MudPIT ( <i>ΔtatC</i> ) | Putative 2-oxoglutarate dehydrogenase                                                                |
| SCO5359              | MudPIT (mutual)         | 50S ribosomal protein L31                                                                            |
| SCO5362              | MudPIT ( <i>ΔtatC</i> ) | Conserved hypothetical protein                                                                       |
| SCO5370              | 2D                      | ATP synthase delta chain                                                                             |
| SCO5371              | 2D                      | ATP synthase alpha chain                                                                             |
| SCO5373              | MudPIT ( <i>ΔtatC</i> ) | ATP synthase beta chain                                                                              |
| SCO5374              | MudPIT ( <i>ΔtatC</i> ) | ATP synthase epsilon chain                                                                           |
| SCO5396              | 2D                      | Putative cellulose-binding protein                                                                   |
| SCO5398              | MudPIT (M145)           | Conserved hypothetical protein                                                                       |
| SCO5405              | 2D                      | Putative transcriptional regulator                                                                   |
| SCO5444              | MudPIT ( <i>ΔtatC</i> ) | Putative glycogen phosphorylase                                                                      |
| SCO5464              | MudPIT (mutual)         | Possible calcium binding protein                                                                     |

|                      |                                 |                                                                               |
|----------------------|---------------------------------|-------------------------------------------------------------------------------|
| SCO5465              | MudPIT (mutual)                 | Conserved hypothetical protein                                                |
| SCO5470              | MudPIT (mutual)                 | Serine hydroxymethyltransferase                                               |
| SCO5490              | MudPIT ( $\Delta$ <i>tatC</i> ) | Conserved hypothetical protein                                                |
| SCO5514              | MudPIT (mutual)                 | Acetolactate synthase small subunit                                           |
| SCO5515              | MudPIT (mutual)                 | Probable D-3-phosphoglycerate dehydrogenase                                   |
| SCO5522              | 2D and MudPIT (M145)            | 3-isopropylmalate dehydrogenase                                               |
| SCO5545              | MudPIT (mutual)                 | Hypothetical protein SC1C2.26                                                 |
| SCO5547              | 2D                              | Glutamyl-tRNA synthetase                                                      |
| SCO5553              | MudPIT ( $\Delta$ <i>tatC</i> ) | 3-isopropylmalate dehydratase large subunit                                   |
| SCO5561              | MudPIT (mutual)                 | Hypothetical protein SC7A1.05c                                                |
| SCO5564              | MudPIT (M145)                   | Putative 50S ribosomal protein L28                                            |
| SCO5570              | 2D and MudPIT (M145)            | Hypothetical protein                                                          |
| SCO5571              | MudPIT ( $\Delta$ <i>tatC</i> ) | 50S ribosomal protein L32                                                     |
| SCO5584              | 2D and MudPIT (M145)            | Nitrogen regulatory protein P-II                                              |
| SCO5591              | MudPIT (mutual)                 | 30S ribosomal protein S16                                                     |
| SCO5607              | MudPIT ( $\Delta$ <i>tatC</i> ) | Putative transcriptional regulator                                            |
| SCO5624              | MudPIT (M145)                   | 30S ribosomal protein S2                                                      |
| SCO5651              | MudPIT (M145)                   | Hypothetical protein SC6A9.16                                                 |
| SCO5655              | 2D                              | Putative aminotransferase                                                     |
| SCO5699              | 2D                              | Prolyl tRNA synthetase                                                        |
| SCO5703              | 2D                              | Hypothetical protein SC5H4.27                                                 |
| SCO5723              | MudPIT ( $\Delta$ <i>tatC</i> ) | Putative regulator, BldB                                                      |
| SCO5736              | MudPIT (mutual)                 | 30S ribosomal protein S15                                                     |
| SCO5737 <sup>†</sup> | 2D and MudPIT (mutual)          | Guanosine pentaphosphate synthetase/polyribonucleotide nucleotidyltransferase |
| SCO5744              | 2D                              | Putative dihydrodipicolinate synthase                                         |
| SCO5745              | 2D                              | Conserved hypothetical protein SC9A10.09                                      |
| SCO5759              | MudPIT ( $\Delta$ <i>tatC</i> ) | Hypothetical protein SC7C7.14                                                 |
| SCO5777              | MudPIT (M145)                   | Glutamate uptake system ATP-binding protein                                   |
| SCO5806              | MudPIT ( $\Delta$ <i>tatC</i> ) | Conserved hypothetical protein SC4H2.27c                                      |
| SCO5838              | MudPIT ( $\Delta$ <i>tatC</i> ) | Putative protease                                                             |
| SCO5841              | MudPIT (mutual)                 | Phosphocarrier protein hpr                                                    |
| SCO5843              | 2D                              | Hypothetical protein SC9B10.10                                                |
| SCO5853              | 2D                              | Conserved hypothetical protein SC9B10.20c                                     |
| SCO5862              | 2D                              | Two-component regulator CutR                                                  |
| SCO5971              | MudPIT ( $\Delta$ <i>tatC</i> ) | Conserved hypothetical protein                                                |
| SCO5976              | MudPIT (M145)                   | Ornithine carbamoyltransferase                                                |
| SCO5984              | 2D                              | Putative acyl-CoA dehydrogenase                                               |
| SCO5999 <sup>†</sup> | 2D and MudPIT (mutual)          | Aconitase                                                                     |
| SCO6031              | MudPIT (mutual)                 | Uroporphyrinogen decarboxylase                                                |
| SCO6042              | MudPIT ( $\Delta$ <i>tatC</i> ) | Conserved hypothetical protein SC1B5.02                                       |
| SCO6046              | MudPIT (M145)                   | Hypothetical protein                                                          |
| SCO6061              | MudPIT (M145)                   | Putative oxidoreductase                                                       |
| SCO6084              | 2D                              | Putative DNA polymerase                                                       |
| SCO6145              | 2D                              | Hypothetical protein SC1A9.09                                                 |
| SCO6176              | 2D and MudPIT (mutual)          | Conserved hypothetical protein                                                |
| SCO6206              | 2D                              | Putative oxidoreductase                                                       |
| SCO6283              | MudPIT (M145)                   | Conserved hypothetical protein                                                |
| SCO6324              | 2D                              | Putative hydrolase                                                            |



|                      |                                 |                                                   |
|----------------------|---------------------------------|---------------------------------------------------|
| SCO6409              | MudPIT (mutual)                 | Methionine aminopeptidase                         |
| SCO6412              | 2D                              | Putative aminotransferase                         |
| SCO6415              | 2D                              | Putative D-hydantoinase                           |
| SCO6482              | 2D and MudPIT (mutual)          | Conserved hypothetical protein                    |
| SCO6488              | MudPIT (M145)                   | Putative acyl-peptide hydrolase                   |
| SCO6531              | 2D and MudPIT (mutual)          | Putative ATP/GTP binding protein                  |
| SCO6549              | MudPIT (mutual)                 | Hypothetical protein SC5C7.34                     |
| SCO6551              | MudPIT (mutual)                 | Putative oxidoreductase                           |
| SCO6606              | MudPIT (M145)                   | Conserved hypothetical protein SC1F2.03c          |
| SCO6650              | 2D                              | Hypothetical protein SC4G2.24                     |
| SCO6658              | MudPIT (M145)                   | 6-phosphogluconate dehydrogenase                  |
| SCO6663              | MudPIT (M145)                   | Transketolase B                                   |
| SCO6753              | 2D                              | Putative nucleotide sugar-1-phosphate transferase |
| SCO6776              | 2D                              | Conserved hypothetical protein                    |
| SCO6928              | 2D and MudPIT ( $\Delta tatC$ ) | Putative O-methyltransferase.                     |
| SCO7000 <sup>†</sup> | MudPIT (mutual)                 | Isocitrate dehydrogenase                          |
| SCO7072              | MudPIT (M145)                   | Conserved hypothetical protein                    |
| SCO7271              | MudPIT ( $\Delta tatC$ )        | Putative ion channel subunit                      |
| SCO7286              | MudPIT ( $\Delta tatC$ )        | Putative oxidoreductase                           |
| SCO7293              | 2D                              | Conserved hypothetical protein                    |
| SCO7481              | 2D and MudPIT (mutual)          | Conserved hypothetical protein                    |
| SCO7510 <sup>†</sup> | 2D and MudPIT (mutual)          | Peptidyl-prolyl cis-trans isomerase               |
| SCO7511              | 2D                              | Glyceraldehyde 3-phosphate dehydrogenase          |
| SCO7647              | MudPIT ( $\Delta tatC$ )        | Putative calcium binding protein                  |
| SCO7654              | MudPIT (M145)                   | Putative oxidoreductase                           |
| SCO7676              | MudPIT (mutual)                 | Putative ferredoxin                               |
| SCO7683              | MudPIT (M145)                   | Putative non-ribosomal peptide synthase           |
| SCO7699              | 2D                              | Putative nucleotide-binding protein               |
| SCO7700              | 2D                              | Putative cyclase                                  |
| SCO7728              | 2D and MudPIT ( $\Delta tatC$ ) | Conserved hypothetical protein                    |
| SCO7730              | MudPIT (mutual)                 | Conserved hypothetical protein                    |

Proteins are listed by SCO number. Method of observation indicates which technique was used to identify a particular protein. 2D is two-dimensional gel electrophoresis; MudPIT is multidimensional protein identification technology. Bracketed after MudPIT is indicated ' $\Delta tatC$ ' if the protein was found in the cell-wall fraction of the *tatC* mutant strain only, 'M145' if the protein was found in the cell-wall fraction of the M145 strain only and 'mutual' if it was found in the cell-wall fractions of both the M145 and the *tatC* mutant strains.

<sup>†</sup>These proteins have also been identified in the extracellular fraction of *S. coelicolor* grown in liquid medium (Kim DW, Chater K, Lee KJ, Hesketh, A (2005) *J Bacteriol* 187: 2957-2966).
