# Supplementary material
Source: PubMed Central journal article supplement (PMC1693849)
Supplement: pnas_0607025103_6.pdf [file pnas_0607025103_6.pdf]

**Table 4. Exported proteins observed in the cell wall-associated fraction of the *tatC* mutant strain identified by either two-dimensional gel electrophoresis and/or multidimensional protein identification technology**

| <b>Sco number</b>                    | <b>Method of observation</b>           | <b>Tat substrate prediction</b> | <b>Product</b>                                                         | <b>Putative signal peptide</b>                                 |
|--------------------------------------|----------------------------------------|---------------------------------|------------------------------------------------------------------------|----------------------------------------------------------------|
| <b>Twin-arginine signal peptides</b> |                                        |                                 |                                                                        |                                                                |
| SCO0131 <sup>†</sup>                 | 2D                                     |                                 | Putative secreted protein (DNase I-like)                               | MFRRTLPLVLA AAVGLAAAAAGPATAD                                   |
| SCO0462                              | MudPIT (mutual)                        |                                 | Putative oxidoreductase                                                | MRIAVIGAGGVGGYFGARLAAAGNEVTFVARGGHLAAIRRSGLVVHSPLGELRTSPDSVVAS |
| SCO0494                              | 2D and MudPIT (mutual)                 |                                 | Putative iron-siderophore binding lipoprotein (FhuD type)              | MLLRTRTKPWRLAAALSAAALGVLLAGCGSDSD                              |
| SCO0736                              | MudPIT (mutual)                        | TatP and TatFind                | Putative secreted protein                                              | MGDIRRRGAVALGV TALVAPLTLALTAAPAQAA                             |
| SCO1230                              | 2D and MudPIT (mutual)                 | TatP                            | Putative secreted tripeptidylaminopeptidase                            | LRKSSIRRRATAFGTAGALVTATLIAGAVSAPAASAA                          |
| SCO1725                              | MudPIT (mutual)                        |                                 | Putative secreted hydrolase (similar to scabies esterase)              | MRRFRLVGFLSSLVLAAGAALTGAATAQAA                                 |
| SCO1860                              | 2D and MudPIT (mutual)                 | TatP                            | Putative secreted protein                                              | MSLMRAPHACL TGGPTTLNGNTRMPARRLATVAAATALAAGPATLAGAGSAHAT        |
| SCO2116 <sup>†</sup>                 | 2D and MudPIT ( $\Delta$ <i>tatC</i> ) |                                 | Putative secreted protein similar in parts to bacterial AmpD (amidase) | LSAEHRRNRNKKRLLVYGVASAVVVAATTGTLALASPGLLGLDADQAAAA             |

|         |                                       |         |                                                                                                   |                                                   |
|---------|---------------------------------------|---------|---------------------------------------------------------------------------------------------------|---------------------------------------------------|
| SCO2150 | MudPIT<br>( <i>ΔtatC</i> )            |         | Cytochrome C heme-binding subunit                                                                 | MKKLSARRRHPLAALVVLLLALACTGGLYAAFAPASKAQAD         |
| SCO2217 | 2D and<br>MudPIT<br>(mutual)          | TatFind | Putative secreted protein                                                                         | MGRNTRKRRTPLATKIVAGAAALAIGGGGLVWAN                |
| SCO2270 | 2D and<br>MudPIT<br>( <i>ΔtatC</i> )  |         | Putative membrane protein                                                                         | MPVRRRRPTALAAAVATAAALGTTALAALGGATAASAA            |
| SCO2446 | 2D and<br>MudPIT<br>(mutual)          |         | Putative secreted peptidase<br>(pfam00082, Peptidase_S8,<br>Subtilase family)                     | MSTGPVRRGAALLSAGLVIALLPAGTSAAQ                    |
| SCO2505 | MudPIT<br>(mutual)                    |         | Putative ABC-transporter<br>metal-binding lipoprotein<br>(cd01019, ZnuA, Zinc<br>binding protein) | MNVRRRRISGIAVTAATALGLGTLSACSSDSSAA                |
| SCO2591 | 2D* and<br>MudPIT<br>( <i>ΔtatC</i> ) |         | Putative secreted protein<br>(Integrin?)                                                          | LFTSRARLRTRRSRLLTCTALAVAAGMLVTTPAVAA              |
| SCO2920 | MudPIT<br>(mutual)                    |         | Putative secreted protease<br>pfam05547, Peptidase_M6,<br>Immune inhibitor A<br>peptidase M6      | MTRRSWTFRTAATTVAFAAAAATFSAAGVAQAD                 |
| SCO3540 | 2D                                    |         | Proteinase (putative<br>secreted protein)                                                         | MDTRRTHRRTRTGGTRFRATLLTAALLATAACSAGGASTSAGSPAAKAA |
| SCO3667 | MudPIT<br>(mutual)                    | TatP    | Putative secreted solute-<br>binding protein                                                      | MSSRARRIAISVAASLMTFSLASCGMLGASESSD                |
| SCO4584 | 2D and<br>MudPIT<br>(mutual)          |         | Putative membrane protein<br>(lolA lipo-protein sorting<br>protein)                               | MAPIDSDDNTTAGAGEELRAGRKAARYVVPVAVMGVAAATIGLVPALA  |

|                      |                              |         |                                                                          |                                                                     |
|----------------------|------------------------------|---------|--------------------------------------------------------------------------|---------------------------------------------------------------------|
| SCO5022              | MudPIT<br>( <i>ΔtatC</i> )   | TatFind | Putative lipoprotein                                                     | MNRRRPTLLAALTLTAAAALTLSACGS                                         |
| SCO5260              | MudPIT<br>( <i>ΔtatC</i> )   |         | Secreted protein<br>(periplasmic binding protein<br>AtrA)                | MTARSTRRTTAAHSRLAAVGAIAVAGALLLTGCGDQTENGD                           |
| SCO5447              | 2D                           |         | Putative neutral zinc<br>metalloprotease                                 | MLSSSTPHRRTSHTTSHTSRRTAHRRAAAVALAGVAALIATAVQSGTATAA                 |
| SCO5477 <sup>†</sup> | 2D and<br>MudPIT<br>(mutual) |         | Putative oligopeptide-<br>binding lipoprotein                            | MTTQRTSGRRKQALAAAAVVAALLTTAACGGGGDDDSGGG                            |
| SCO5650              | MudPIT<br>( <i>ΔtatC</i> )   |         | Putative membrane protein                                                | MAVLSIISRTASRRGVRALGVVAASAALALSASGNALAC                             |
| SCO6096              | MudPIT<br>( <i>ΔtatC</i> )   |         | Putative lipoprotein                                                     | MPATSALRRTLAVIAALPLLTLAACGYGSQAK                                    |
| SCO6108              | 2D and<br>MudPIT<br>(mutual) |         | Esterase fusH                                                            | MATLIPKKGSTLLNKGIRTRRARGALAGGTVLTAALLTAVPAAQAI                      |
| SCO6197              | 2D and<br>MudPIT<br>(mutual) | TatP    | Putative secreted protein                                                | MSTTSVNGSRKRRVLLRRALPVCVAAGVASIVVFGSGSSPDAAAR                       |
| SCO6407              | 2D and<br>MudPIT<br>(mutual) |         | Putative gamma-<br>glutamyltranspeptidase<br>(putative secreted protein) | MRRPVARNLTVLAVSAAVVVSVGAAAP                                         |
| SCO6572              | 2D                           |         | Putative glycosyl hydrolase<br>(putative secreted protein)               | MRSVGAGRWRRVASQVGRSVTVWAVSTLTMLVLAGILPDFRLQSPDGDSATDIAM<br>TAAVGAGA |
| SCO6590              | 2D and<br>MudPIT<br>(mutual) |         | Putative secreted esterase<br>(trypsin like serine<br>protease)          | MSSIRRSRSAVLGAVLTAGSLALSTAAAVAVTGGTPVADSD                           |

|                                          |                         |                  |                                                                          |                                           |
|------------------------------------------|-------------------------|------------------|--------------------------------------------------------------------------|-------------------------------------------|
| SCO6608                                  | 2D and MudPIT (mutual)  |                  | Putative secreted protein (exopolysaccharide biosynthesis)               | MKLRKRRLCAATGVVLGALTALAALPPAAVAS          |
| SCO6736                                  | 2D and MudPIT (mutual)  |                  | Putative metallopeptidase                                                | MPLRLGAFVHRRFIVPGALGAASLMLAIPASAAA        |
| SCO7657                                  | 2D and MudPIT (mutual)  | TatP             | Putative secreted protein                                                | MTRTRTTRLRRPLL TGSTAVAAMAVTAGLVAATAEPAKAA |
| SCO7677 <sup>†</sup>                     | 2D and MudPIT (mutual)  | TatP and TatFind | Putative secreted solute-binding protein                                 | MSRQIDRRSFLRRGAAGAAALAVGPGLLAACSTDEPGSA   |
| <b>Non twin-arginine signal peptides</b> |                         |                  |                                                                          |                                           |
| SCO0297 <sup>†</sup>                     | 2D and MudPIT (mutual)  |                  | Putative secreted protein                                                | MRSTGPVSRIGRSLAAVTATAAAGAVAALGLAASPAAAA   |
| SCO0324                                  | 2D                      |                  | Putative secreted protein (superfamily Quinoprotein amine dehydrogenase) | MSPKSKRTRAALAALVVAAGSLVTAGAARAE           |
| SCO0472                                  | MudPIT (mutual)         |                  | Putative secreted protein (Quinoprotein amine dehydrogenase)             | LNTSIRNRAVTGTALALAVSAVLTACGGDTSSSD        |
| SCO0762 <sup>†</sup>                     | 2D and MudPIT (mutual)  |                  | Putative secreted protein                                                | MRNTARWAATLGLTATAVCGPLAGASLAS             |
| SCO2008                                  | MudPIT (mutual)         |                  | Putative branched chain amino acid binding protein                       | MPGKGLIVRQRSLIAITAALAAGALTLTACGS          |
| SCO2096                                  | MudPIT ( $\Delta$ tatC) |                  | Putative membrane protein (Transglutaminase/protease-                    | MMSGRARLAMCAWAATLMAACALLPLVEPATWILQAA     |

|                      |                              |  |                                                                      |                                                  |
|----------------------|------------------------------|--|----------------------------------------------------------------------|--------------------------------------------------|
|                      |                              |  | like)                                                                |                                                  |
| SCO2271              | MudPIT<br>( <i>ΔtatC</i> )   |  | Hypothetical secreted protein                                        | MPARLRALVTVLCAAVLAALLPAAAAHAE                    |
| SCO2483              | 2D                           |  | Putative secreted protein                                            | MHSTTSRGAVLATLLALIGVFATYRALPAGAD                 |
| SCO2892              | 2D and<br>MudPIT<br>(mutual) |  | Putative secreted protein                                            | MTRGRDGGAGAPPTKHRALLAAIVTLIVAISAAIYAGASAD        |
| SCO3053              | 2D and<br>MudPIT<br>(mutual) |  | Putative secreted esterase<br>(FusH-like)                            | MSRFRSRAAVTAGLTAIAVAAGCLVVGPVQAA                 |
| SCO3176              | 2D                           |  | Putative membrane protein                                            | MRPSSLRSPWTRAAVAGAAAAGLAAAGLAGVAHAA              |
| SCO3487              | 2D                           |  | Putative hydrolase                                                   | MTVHKRACTTPPPRASRSFRVRWPVLIAAACAGLVLATTSPPAVAA   |
| SCO3966              | MudPIT<br>( <i>ΔtatC</i> )   |  | Putative secreted protein<br>(thioredoxin-like)                      | MRKKTFAAALLAAACLTLACGSGADSD                      |
| SCO4589              | 2D                           |  | Putative aminopeptidase<br>(putative secreted protein)(Zn dependent) | MQLLPSGRALTAGAVAVVTLMAGGSAAGAASAPVHPATPTGTAAAAAA |
| SCO4891              | MudPIT<br>( <i>ΔtatC</i> )   |  | Putative secreted protein                                            | MRTRTKLTTVLASGTLAAGLLVGGASSASAG                  |
| SCO5113 <sup>†</sup> | 2D and<br>MudPIT<br>(mutual) |  | BldKB, putative ABC<br>transport system lipoprotein                  | MSILRNRTATAAIVAVAAGALTLTACGGGSDSSAK              |
| SCO5232              | MudPIT<br>( <i>ΔtatC</i> )   |  | Putative sugar transporter<br>sugar binding protein                  | MKRKLIAAIGIAGMMVSIACGG                           |

|         |                                |  |                                                                                |                                              |
|---------|--------------------------------|--|--------------------------------------------------------------------------------|----------------------------------------------|
| SCO5420 | 2D and MudPIT ( <i>ΔtatC</i> ) |  | Cholesterol esterase                                                           | MESQVRGGTRWKRFVVMVPSVAATAAIGVALAQQGALAA      |
| SCO5660 | MudPIT (mutual)                |  | Putative secreted peptidase                                                    | MRARSHAVLAASVVLALAAGPLAAPFAA                 |
| SCO5776 | MudPIT (mutual)                |  | Glutamate binding protein                                                      | MKLRKVSAAAVLALALTATACGG                      |
| SCO6109 | 2D and MudPIT (mutual)         |  | Putative secreted hydrolase (fusH-like)                                        | MFAMPRSARLTALSAALLAGALASSSTPALATAGA          |
| SCO6199 | 2D and MudPIT (mutual)         |  | Secreted esterase                                                              | MHRTRPGGHPRSIRFATLAISLTAGSALMTASPAVAVTGPAAAD |
| SCO6591 | 2D and MudPIT (mutual)         |  | Putative secreted protein                                                      | MKKRSSFVRVLGAAATAGALAWAVLAQGNAGAA            |
| SCO6710 | 2D                             |  | Putative glycosyl hydrolase                                                    | MWAALLAGLLMVLGLQATSASGQPAKAPAAAAA            |
| SCO6723 | 2D and MudPIT (mutual)         |  | Putative oxidoreductase (putative secreted protein) (sialidase?)               | MALAGAVCAAALAALTAVPAQAH                      |
| SCO7250 | 2D and MudPIT (mutual)         |  | Conserved hypothetical protein (Amidase_2, N-acetylmuramoyl-L-alanine amidase) | MPALATAALLPLLGAAPSAAAPTAAP                   |

Proteins are listed by SCO number and the signal peptide sequences are given in the right column. Method of observation indicates which technique was used to identify a particular protein (2D is two-dimensional gel electrophoresis; MudPIT is multidimensional protein identification technology. Bracketed after MudPIT is indicated '*ΔtatC*' if the protein was found in the cell-wall fraction of the *ΔtatC* mutant

strain only, and 'mutual' if it was found in the cell-wall fractions of both the M145 and the  $\Delta tatC$  mutant strains. The column annotated 'Tat substrate prediction' indicates whether a particular protein has been identified as a putative Tat substrate by either of the two prediction programs TatFind or TatP.

\*This protein migrated in a unique position on two-dimensional gel analysis of the extracellular fraction from the M145 strain. However it was detected in the *tatC* mutant strain by MudPIT analysis.

† These proteins have also been identified in the extracellular fraction of *S. coelicolor* grown in liquid medium (Kim DW, Chater K, Lee KJ, Hesketh A (2005) *J Bacteriol* 187: 2957-2966).
