# Supplementary material
Source: PubMed Central journal article supplement (PMC1693849)
Supplement: pnas_0607025103_7.pdf [file pnas_0607025103_7.pdf]

**Table 5. Oligonucleotide primers used in this study**

|                                              |                                                                                |
|----------------------------------------------|--------------------------------------------------------------------------------|
| Primers for deletion of <i>tatA</i>          |                                                                                |
| TATAF                                        | acc cac cca gcc gcc tcg gtg aga agg taa aga ctt atg att ccg ggg atc cgt cga cc |
| TATAR                                        | atc tcg tgc ggc ggg ccg gag atc acc ggc cct gcg tca tgt agg ctg gag ctg ctt c  |
| Primers for deletion of <i>tatB</i>          |                                                                                |
| TATBF                                        | ccg tgg tgg cgg ccc gga cat ccc aag gag ctt cag gtg att ccg ggg atc cgt cga cc |
| TATBR                                        | ttc ccg gcc cgc ggg ccg ggc gtg gga gga gcg ggg tca tgt agg ctg gag ctg ctt c  |
| Primers for deletion of <i>tatC</i>          |                                                                                |
| TATCF                                        | cct gcc cgc aac aag gag aag gac ccc gag ggg cgg atg att ccg ggg atc cgt cga cc |
| TATCR                                        | ggg cgg cga cgc gtg ccg tca ccg ccc cgg cgg tcc tca tgt agg ctg gag ctg ctt c  |
| Primers for construction of agarase reporter |                                                                                |
| Agarase-F                                    | ggc ggc aag ctt aga tct acc gat tgt cac cct gcg                                |
| AgaraseLeadnde                               | ggc cgg gaa ttc cat atg cgt tet cct tet tcg att cc                             |
| Agaraseleadbam                               | ggc ggc gga tcc gca gac ctc gaa tgg gaa c                                      |
| AgaraseRxba                                  | ggc ggc tet aga tct gtt ccg tga ggt gc                                         |
| AadAFnde                                     | ggc ggc cat atg cta ttt gcc gac tac ctt gg                                     |
| AadARbam                                     | ggc ggc gga tcc ctg acg ccg ttg gat aca cc                                     |

| Primers for construction of myc-tagged agarase                                |                                                                                                                                                                                                                         |                                                                 |            |
|-------------------------------------------------------------------------------|-------------------------------------------------------------------------------------------------------------------------------------------------------------------------------------------------------------------------|-----------------------------------------------------------------|------------|
| kddagaf                                                                       | gga att cca tat ggt caa ccg acg tga tct                                                                                                                                                                                 |                                                                 |            |
| kddagamyc                                                                     | gag gat ccc tac aga tcc tcc tcc gag atg agc ttc tgc tcc acg gcc tga tac gtc ctg a                                                                                                                                       |                                                                 |            |
| Primers to amplify various signal peptides for cloning in frame with agarase. |                                                                                                                                                                                                                         |                                                                 |            |
| Gene*                                                                         | Oligonucleotides                                                                                                                                                                                                        | Signal peptide**                                                | Plasmid*** |
| SCO0432                                                                       | F=ggc gcg cat atg aga cgg atc cgc ctg ttg<br>R=ggc gcg gga tcc ggt gct cgc gag tgc ggg tac                                                                                                                              | MRRIRLLAAISAGLALAAGA↓VAPVPALAST                                 | pTDW92     |
| SCO0474                                                                       | F=ggc gcg cat atg gaa ccg acc gtc cgc ac<br>R=ggc gcg gga tcc ctc ggt cgc cgc ggg ttc                                                                                                                                   | MEPTVTRTHPTRRLPTALVLTAAALLATGCSEQS↓DDGREPAATE                   | pTDW73     |
| SCO0494                                                                       | F=ggc cgc cat atg ctc ctc aga aca acg<br>R=ggc gcg gga tcc cac ggt gac cgg gaa ggc                                                                                                                                      | MLLRTTRTKPWRRLLAAALSAAALGVGLLAGCGSDS↓DDPADEAGGG<br>TPAAAGAFPVTV | pTDW121    |
| SCO0736                                                                       | F=ggc cgc cat atg ggg gac ata cgc aga c<br>R=ggc cgc gga tcc gca gct cgc ggc ctg ggc                                                                                                                                    | MGDIRRRGAVALGVLTALVAPLTLALTA↓APAQAASC                           | pTDW102    |
| SCO0930                                                                       | F=ggc gcg cat atg aag acc tcc tgg cgg agc<br>R=ggc gcg gga tcc gcc ggg ggc ggc cgt ggc                                                                                                                                  | MKTSWRSASLVAGAAALLALTACG↓QDGGGPTGSQNVGATAAPG                    | pTDW119    |
| SCO1172                                                                       | F=ggc gcg cat atg gaa agg gag agg aca gc<br>R=ggc gcg gga tcc gta gtc gac ggc acg gac                                                                                                                                   | MERERTAPVPTRRRLLKGAALATVPYTLLSGTRAAA↓QVRAVDY                    | pTDW74     |
| SCO1196                                                                       | F=ggc gcg cat atg gcc ctc acc acc cga cg<br>R=ggc gcg gga tcc ctg gga cgc cag cgc ggt acc                                                                                                                               | MALTTRRRALTTLGAALTGAVALPA↓GTALASQ                               | pTDW75     |
| SCO1230                                                                       | F=ggc cgg cat atg agg aag agc agc ata cgg cgg agg<br>gcg acc gcc ttc ggc acg gcc gga gca ctg gtc acc g<br>R=ggc cgg gga tcc ggc gct cgc ggc ggg tgc cga gac<br>ggc gcc ggc gat cag cgt ggc ggt gac cag tgc tcc ggc<br>c | MRKSSIRRRATAFGTAGALVTATLIAGA↓VSAPAASA                           | pTDW48     |
| SCO1356                                                                       | F=ggc gcg cat atg acc agc gca cgg ttt c<br>R=ggc gcg gga tcc gcc gcc gtc gcc gga cgc                                                                                                                                    | MTSAPFHPAAGPARRTVVAAGAAGLTAVLAACS↓DSDDGASGDGG                   | pTDW76     |
| SCO1396                                                                       | F=ggc gcg cat atg aca cga ctc tcc gcc<br>R=ggc gcg gga tcc ctc gtg ccg tgc ctg cgc                                                                                                                                      | MTRLSAALRGLATTF AALLAVTAVPAAS↓APATAQARHE                        | pTDW103    |
| SCO1432                                                                       | F=ggc gcg cat atg caa cga cgg acc cgc ccg acc egg<br>aca                                                                                                                                                                | MQRRTRPTRTPGGLPLMSRVEQPSRRALLAAVAAA AVTGGA↓IPAT<br>ARAA         | pTDW118    |

|           |                                                                                                                                                                                                                                                                   |                                                                       |         |
|-----------|-------------------------------------------------------------------------------------------------------------------------------------------------------------------------------------------------------------------------------------------------------------------|-----------------------------------------------------------------------|---------|
|           | R=ggc gcg aga tct tgc ggc ccg ggc ggt cgc cgg gat<br>c                                                                                                                                                                                                            |                                                                       |         |
| SCO1565   | F=ggc gcg cat atg gga acg cag gag tgc gac<br>R=ggc gcg gga tcc ggt gcc ggc ggc tct cgc cgt g                                                                                                                                                                      | MGTQESDERAGGGTGRRALLGAAVLGAGGAVLGLPGTARA↓AGT                          | pTDW77  |
| SCO1590I  | F=ggc ggc cat atg ggc ggt gtc tgc cgc cgt gcc ttc<br>acg gtg gcg gcg ttg tgc gcg<br>R=ggc ggc gga tcc cgc cga cgc ctc ggg cac gag cgt<br>gaa cgc cga caa cgc cgc cac cgt                                                                                          | MGGVSRRAFTVAALSAFTLVPEA↓SA                                            | pTDW49  |
| SCO1590II | F= as above<br>R=ggc ggc gga tcc ggg ggt cgc cgc cga cgc ctc ggg<br>cac gag cgt gaa cgc cga caa cgc cgc cac cgt                                                                                                                                                   | MGGVSRRAFTVAALSAFTLVPEASAA↓TP                                         | pTDW51  |
| SCO1639   | F=ggc gcg cat atg cgc cga cgc tca ctc ctc atc gcc<br>gtc ccc acg gga ctg gtc acg ctc gcc gcc tgc ggt gac<br>agc gac gac tcc gg<br>R=ggc gcg gga tcc cgc ggc cga ggt ggc cga cgc gtc<br>ggg cga cgg gct ctc gct cgc gtt gct cga cga gcc gga<br>gtc gtc gct gtc acc | MRRRSLLIAPTGLVTLAACGSDSDSGSSSNA↓SESPSPDASATSAA                        | pTDW52  |
| SCO1824   | F=ggc gcg cat atg acc gct ccc ctc tgc<br>R=ggc gcg gga tcc ggg cgc ggc ctc ggc cgc                                                                                                                                                                                | MTAPLSRHRRALAIAGLAVAASLAFPLGTPAA↓ATPAEEAAP                            | pTDW78  |
| SCO1906   | F=ggc gcg cat atg tgc ctc act cgc agg<br>R=ggc gcg gga tcc cgt gga cgc gag ggc gtt g                                                                                                                                                                              | MSLTRRDFAGRSALTGAGVVLAGSVGALA↓TAPNALAST                               | pTDW91  |
| SCO1948   | F=ggc gcg cat atg aga cga aga gcg aga tc<br>R=ggc gcg gga tcc ggg ttg tgc ctg ggc gat g                                                                                                                                                                           | MRRRARSILAVGALLIGGASFA↓PIAQAQP                                        | pTDW79  |
| SCO1968   | F=ggc gcg cat atg cac gtg cgc gca gta g<br>R=ggc gcg gga tcc cgc ctc gtc cgc ccg cgc gtg                                                                                                                                                                          | MHVRAVAVTTTALLGVALT↓APLSHARADEA                                       | pTDW104 |
| SCO2068   | F=ggc gcg cat atg acc agt cga cac aga gc<br>R=ggc gcg gga tcc ggg ggc cgc gtc ggc cgc                                                                                                                                                                             | MTSRHRASENSRTPSRRTVVKAAAAGAVLAAPLAAA↓LPAGAADAA<br>P                   | pTDW90  |
| SCO2226   | F=ggc gcg cat atg cct gcc acg cgc cgt ac<br>R=ggc gcg gga tcc ggt gtc ggc ccg tgc ggc gag                                                                                                                                                                         | MPATRRTARVRRVAAVTVTALAAA↓LLPPLAARADT                                  | pTDW89  |
| SCO2286   | F=ggc gcg cat atg aca ccc gcg aac cac<br>R=ggc gcg gga tcc ctc ggc ggc gct cgc ggt g                                                                                                                                                                              | MTPANHQAPTSAPSPAPSQSSHAPELRAAARSLGRRRFLTVTGAAAA<br>LAFAVNLPA↓AGTASAAE | pTDW88  |
| SCO2383   | F=ggc gcg cat atg cgt ctc aga cgc ccc cgc ag<br>R=ggc gcg gga tcc gct gtc ggc gac ggc act g                                                                                                                                                                       | MRLRRPRRPSDGPGRSGARRLRVASAPLI<br>PLTVIGAVVAGLIGPEPPSDG↓PLPGTSAVADS    | pTDW80  |
| SCO2446   | F=ggc gcg cat atg agc aca gga cca gtc aga cgc ggg<br>gcg gcc ctc ctg tgc gcg ggg ctc gtg                                                                                                                                                                          | MSTGPVRRGAALLSAGLVIALLPAA↓GTSAAQ                                      | pTDW53  |

|                   |                                                                                                                                                                                                             |                                                                                             |         |
|-------------------|-------------------------------------------------------------------------------------------------------------------------------------------------------------------------------------------------------------|---------------------------------------------------------------------------------------------|---------|
|                   | R=ggc gcg gga tcc ctg cgc cgc cga ggt ccc ggc egg<br>cag cag cgc gat cac gag ccc cgc cga cag gag                                                                                                            |                                                                                             |         |
| SCO2591           | F=ggc gcg cat atg ttc aca tea cgc gcg cgc ctc aga<br>R=ggc gcg gga tcc gtc ggc ggc gac ggc ggg ag                                                                                                           | MFTSRARLRTRRSRLTCTALAVAAGMLVTT↓PAVAAD                                                       | pTDW106 |
| SCO2637           | F=ggc gcg cat atg acc aac agc ccc cag<br>R=ggc gcg gga tcc gtc ggc ggc gag ggc cac                                                                                                                          | MTNSPQREPIPGARRAARLALATGLAAALA↓AVGPVPVALAAD                                                 | pTDW81  |
| SCO2758           | F=ggc gcg cat atg cac cac agc agc acg g<br>R=ggc gcg gga tcc ggc gtc ggc gta ggc cgt ac                                                                                                                     | MHHSSTAGTGSTAQPSRRSVLTATAVVTAALA↓AGGGTAYADA                                                 | pTDW82  |
| SCO2780           | F=ggc gcg cat atg tcc cac gcc agc gct ac<br>R=ggc gcg gga tcc gtc gcc cgc ccc atc gct c                                                                                                                     | MSHASATHPTRRGILAAGGALGLGAVLAACG↓DGDGKSDGA GD                                                | pTDW83  |
| SCO2786           | F=ggc gcg cat atg aga cct cat cga cgg cac<br>R=ggc gcg gga tcc cgg ttc cgc ggc cgc ctt c                                                                                                                    | MRPHRRHHRTTPRITRLLGSLLLVAAVGAMTTGA↓APVRKAAAEP                                               | pTDW84  |
| SCO2821           | F=ggc gcg cat atg aga cga cca gtc gcg ctg<br>R=ggc gcg gga tcc gcc ggc cgc tgc cgc cgc ctc                                                                                                                  | MRRPVALRLQAALGTLALAAA↓AGVVLTMPAAAAAAG                                                       | pTDW61  |
| SCO3053           | F= ggc gcg cat atg tcc aga ttc cgt tca cgc gcc gcg<br>gtc acc gcg ggt ctg acg gcc atc gcg gtc gcc<br>R=ggc gcg gga tcc ggt ggc ggc ctg gac ggg tcc gac<br>gac gag gca gcc ggc ggc cac cgc gat ggc cgt cag   | MSRFRSRAAVTAGLTAIAVAAGCLVVG↓PVQAAT                                                          | pTDW56  |
| SCO3456           | F=ggc gcg cat atg cgg cac agc gga cgg<br>R=ggc gcg gga tcc ctc gac ccc cgt ggt atc                                                                                                                          | MRHSGRRVKRATVLAAGAAVAGLLTAA↓CSSPDTTGVE                                                      | pTDW62  |
| SCO3471<br>(dagA) | F=ggc cgg cat atg gtc aac cga cgt gat ctc atc aag<br>tgg agt gcc gtc gca ctc gga gcg ggt g<br>R=ggc cgg gga tcc gag gtc tgc ggc atg agc ggc ggg<br>tgc ggg acc cgc gag ccc cgc acc cgc tcc gag tgc<br>gac g | MVNRRDLIKWSAVALGAGAGLAGPAPAAHA↓ADL                                                          | pTDW47  |
| SCO3484           | F=ggc gcg cat atg acc aag cct gtt gtc<br>R=ggc gcg gga tcc acc gga gcc ttg gga cga g                                                                                                                        | MTKPVVPSGVSRRGFLGGSLGVAGAVLLAA↓CSGGGNSSQGSG                                                 | pTDW63  |
| SCO3790           | F=ggc gcg cat atg cgc aag ctc ctg cgg ttg<br>R=ggc gcg gga tcc ggg cgc ggc ctg cgc cga c                                                                                                                    | MRKLLPLIGTPSGSHPGGRSAMTCRFRCGDACFHEVPNTSSNEYVGD<br>VIAGALSRRSMMRAAAVVTVAAGAGAVGVAG↓APSAQAAP | pTDW93  |
| SCO3790shrt       | F=ggc gcg cat atg cgg aac acc agc tcc aac g<br>R= as above                                                                                                                                                  | MPNTSSNEYVGDVIAGALSRRSMMRAAAVVTVAAGAGAVGVAG↓<br>APSAQAAP                                    | pTDW107 |
| SCO4142           | F=ggc gcg cat atg aac cgg cgg gcc ctc gct c<br>R=ggc gcg gga tcc gct gtt ggc ggc ggc gga g                                                                                                                  | MNRRALALGALAVSGALALTACG↓SDDTGNSGSDSSSAAANS                                                  | pTDW60  |
| SCO4152           | F=ggc gcg cat atg cca gtc aca gca cag<br>R=ggc gcg gga tcc ccc gcc cgc gct cgc cga g                                                                                                                        | MPVTAQPHQPRRRRRTSRLLVVAATVVTAGVLAAAALPA↓SASAGG                                              | pTDW64  |

|         |                                                                                                                                                                                                                                 |                                                         |         |
|---------|---------------------------------------------------------------------------------------------------------------------------------------------------------------------------------------------------------------------------------|---------------------------------------------------------|---------|
| SCO4672 | F=ggc gcg cat atg acc cac acc tca cgg<br>R=ggc gcg gga tcc cgg agc ggc gga cgc agc                                                                                                                                              | MTHTSRRGVLAFAASAATVPFGGAAAASPARATATAASA↓VDPAA<br>ASAAP  | pTDW72  |
| SCO4884 | F=ggc gcg cat atg cgt cgg aca tca aga c<br>R=ggc gcg gga tcc gtc gtc gcc gct ctc gcc gct g                                                                                                                                      | MRRTSRLIRVAVGVASLALAATA↓CGGTSGESGDD                     | pTDW87  |
| SCO4885 | F=ggc gcg cat atg cgc cgg att tcc cgg atc<br>R=ggc gcg gga tcc gga ctc cga acc ggc gtc                                                                                                                                          | MRRISRITVAGAATASLALALAACG↓GTSTDSGSES                    | pTDW86  |
| SCO5074 | F=ggc cgc cat atg acc tcg tcg ctg cac<br>R=ggc cgc gga tcc gac gct cgc ggc gtg cgc                                                                                                                                              | MTSSLHHAIRLTTASAIALGGLVTLGTS↓AHAASV                     | pTDW108 |
| SCO5113 | F=ggc ggc cat atg agc att ctc cgt aac cgc acc gcc<br>acg gcc gcc ata gtc gcg gtc gca gcc ggc gcc ctg<br>R=ggc ggc gga tccggc gga gct gtc gct gtc gcc acc<br>acc gca ggc ggt gag ggt cag ggc gcc ggc tgc gac<br>cgc              | MSILRNRTATAAIVAVAAGALTLTACGG↓GDSDSA                     | pTDW50  |
| SCO5447 | F=ggc cgc cat atg ttg agc agc agc act c<br>R=ggc cgc gga tcc gtc ggg ggc cgc ggt ggc                                                                                                                                            | MLSSSTPHRRTSHTTSRRTAHRRAAAVALAGVAALIATAVQS↓G<br>TATAAPD | pTDW109 |
| SCO5461 | F=ggc gcg cat atg atc acc act agt ctg c<br>R=ggc gcg gga tcc cgg ggc ggc ctt ggc ggg                                                                                                                                            | MITTSLRRRTAAAVLSLSAVLATTAATAPGAAPAPSA↓APAKAAP           | pTDW67  |
| SCO5660 | F=ggc gcg cat atg cgt gcc cgt agc cat gca gtt ctc<br>gcc gcc tcg gtc gtc ctc gcc ctg gcc g<br>R=ggc gcg gga tcc cgg cgc ggc gaa ggc ggg ggc<br>cgc cag cgg gcc ggc ggc cag ggc gag gac gac c                                    | MRARSHAVLAASVVLALAAGPLA↓APAFAAP                         | pTDW57  |
| SCO6009 | F=ggc gcg cat atg aac acg cgt atg cgt c<br>R=ggc gcg gga tcc ctc ctt ggc gct gcc aca g                                                                                                                                          | MNTRMRRAAVAVATTAMAVSLAA↓CGSAKE                          | pTDW65  |
| SCO6052 | F=ggc gcg cat atg tcc acg tcc cgc aac g<br>R=ggc gcg gga tcc ggg ctg ggc ggc ggc ggt g                                                                                                                                          | MSTSRNAATTRQVLARTGALGAGIAFTGALSELFA↓GTAAAQP             | pTDW66  |
| SCO6198 | F=ggc gcg cat atg gac acc act tac tgg agc aga cgt<br>cgc gtc ctc acc gtg ctc ggc gcc gcc acc gcg gcg ac<br>R=ggc gcg gga tcc ggc ggc gag agc gcg gga cgg<br>ggc ggc gag agg gat cga ggt cgc cgc ggt ggc ggc<br>gcc              | MDTTYWSRRRVLTVLGAATA ATSIPLA↓APSRALAA                   | pTDW54  |
| SCO6199 | F=ggc gcg cat atg cac cgc aca aga ccc ggg ggc cac<br>ccc cga tcc ata cgc ttc gcc aca ctc gcg atc tcc ctg a<br>R=ggc gcg gga tcc ggt gac ggc gac ggc cgg tga cgc<br>cgt cat gag cgc gga gcc cgc ggt cag gga gat cgc<br>gag tgt g | MHRTRPGGHPRSIRFATLAIISLTAGSALMT↓ASPAVAVT                | pTDW58  |

|             |                                                                                               |                                                                      |         |
|-------------|-----------------------------------------------------------------------------------------------|----------------------------------------------------------------------|---------|
| SCO6272     | F=ggc gcg cat atg acc gag gtg tcc cgc<br>R=ggc gcg gga tcc ccc tgc cgc ggc cgc tgc            | MTEVSRRLMKGAAVSGGALALPALGAPPATA↓APAAGPEDLPGPA<br>AAAAG               | pTDW85  |
| SCO6281     | F=ggc gcg cat atg tcc gcc att tet cgc<br>R=ggc gcg gga tcc ggc gat cgc cgc ggc ggg tg         | MSAISRRRFIRHGAVAGGAAVALPALGGWAGEAFA↓AQPSPAAAIA                       | pTDW116 |
| SCO6418     | F=ggc gcg cat atg gac aga cga gcc ctc<br>R=ggc gcg gga tcc ggt cgc ggc gtc cgt ccc            | MDRRALMLATGGLLGAAGAAQLTAAPSAVA↓AGTDAAT                               | pTDW68  |
| SCO6457     | F=ggc gcg cat atg ccg cac tgc ccc gtg tc<br>R=ggc gcg gga tcc ctc gtc ggc cgc cgc ccg ccg tac | MPHSPVSPAESPAPQGRPRPVVSRRLLEGGAAVLGALALSASPLTA<br>QA↓AVRRAAADE       | pTDW110 |
| SCO6580lng  | F=ggc cgc cat atg acc ccg ttc acc gac<br>R=ggc cgc gga tcc ccg gtc gtg ggc gag cgc            | MTPFTDSSRTDAGTDPSADGPGESLRRALGVNRRRFLSTCTAVAAGA<br>VAAPVFG↓ASPALAHDR | pTDW111 |
| SCO6580shrt | F=ggc gcg cat atg aac cgg cgc cgc ttc<br>R= as above                                          | MNRRRFLSTCTAVAAGAVAAPVFG↓ASPALAHDR                                   | pTDW113 |
| SCO6594     | F=ggc gcg cat atg ccg tct tcc ccc acg<br>R=ggc gcg gga tcc gga gtc ggc ggc ggc ggt tc         | MPSSPTSPSPSGAPEPSGVRRLSLLAAAAAPVLASLAGA↓GTAAAD<br>S                  | pTDW94  |
| SCO6644     | F=ggc gcg cat atg cgc tcc cac cgc cgc<br>R=ggc gcg gga tcc acc gtc acc gga cgc gga a          | MRSHRRPRLAPFLLVPLMAGCFASGGG↓DDSASGDG                                 | pTDW69  |
| SCO6691     | F=ggc gcg cat atg gcc gaa gtg aac cgg<br>R=ggc gcg gga tcc ccg gag tgc cgc ggc ccg gtc        | MAEVNRRRFLQLAGATTAFSALS↓ASIDRAAALP                                   | pTDW70  |
| SCO6738     | F=ggc cgc cat atg aac cgc ctg cgc acc<br>R=ggc cgc gga tcc gga gcc gtc ggc gtg ggc            | MNRLRTL TATTAALAASLLVPSLLTA↓PAHADGS                                  | pTDW114 |
| SCO7399     | F=ggc gcg cat atg aga cgc ctc ctg ctc<br>R=ggc gcg gga tcc ctt gtc ggc ggc ggg ttc            | MRRLLL TAAATTAAALTLAACG↓TTEPAADK                                     | pTDW71  |
| SCO7631     | F=ggc gcg cat atg agc aca gag gaa cag<br>R=ggc gcg gga tcc gcc ggc cgc gtc ggc cgc ctg        | MSTEEQSSGRRHPDRRVLLRAAVAVPAAGAAVAGTAAVPA↓QAAD<br>AAG                 | pTDW95  |
| SCO7677     | F=ggc cgc cat atg tcc aga cag atc gat c<br>R=ggc cgc gga tcc tcc ggg gtt tcc ggc gga g        | MSRQIDRRSFLRRGAAGAAALAVGPGLLAA↓CSTDEPGSAGNPG                         | pTDW115 |

\*The SCO number for each protein whose signal peptide was cloned in frame with mature agarase is given.

\*\* The signal peptide coding sequence that was amplified for each secreted protein is shown, the arrow indicates the most likely position of signal peptide cleavage as determined by SignalP ([www.cbs.dtu.dk/services/SignalP/](http://www.cbs.dtu.dk/services/SignalP/))

\*\*\* The plasmid designation of the final construct carrying the particular signal peptide-agarase fusion is given.
