# Supplementary material
Source: PubMed Central journal article supplement (PMC1693849)

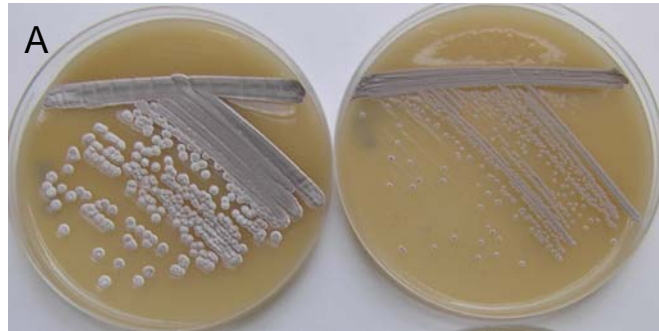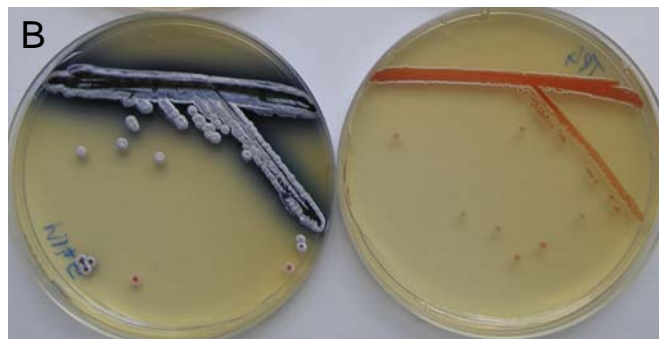

Supplement: pnas_0607025103_1.pdf [file pnas_0607025103_1.pdf]

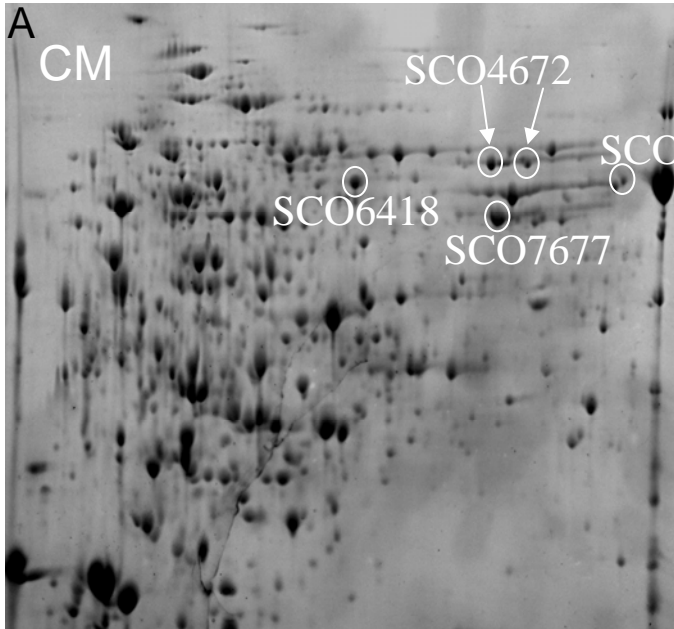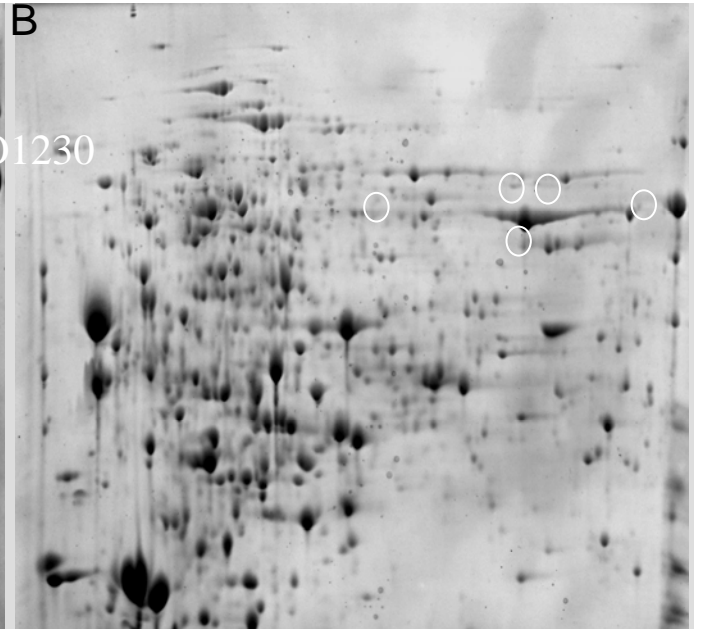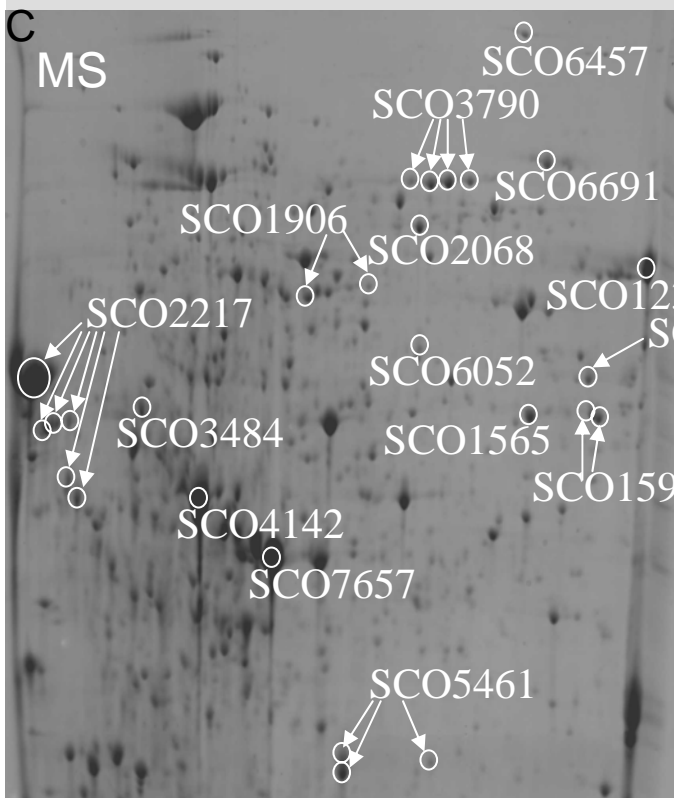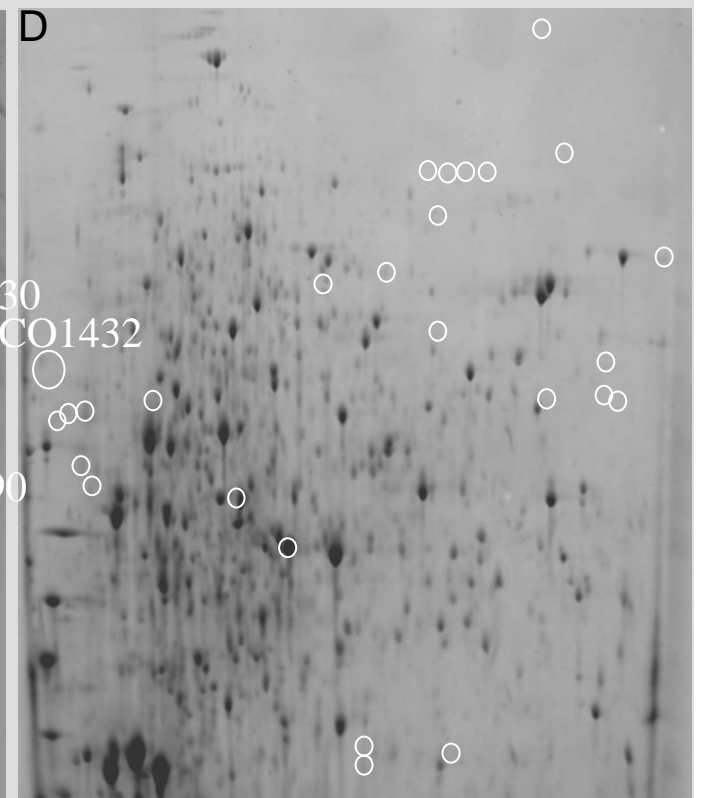

Supplement: pnas_0607025103_2.pdf [file pnas_0607025103_2.pdf]

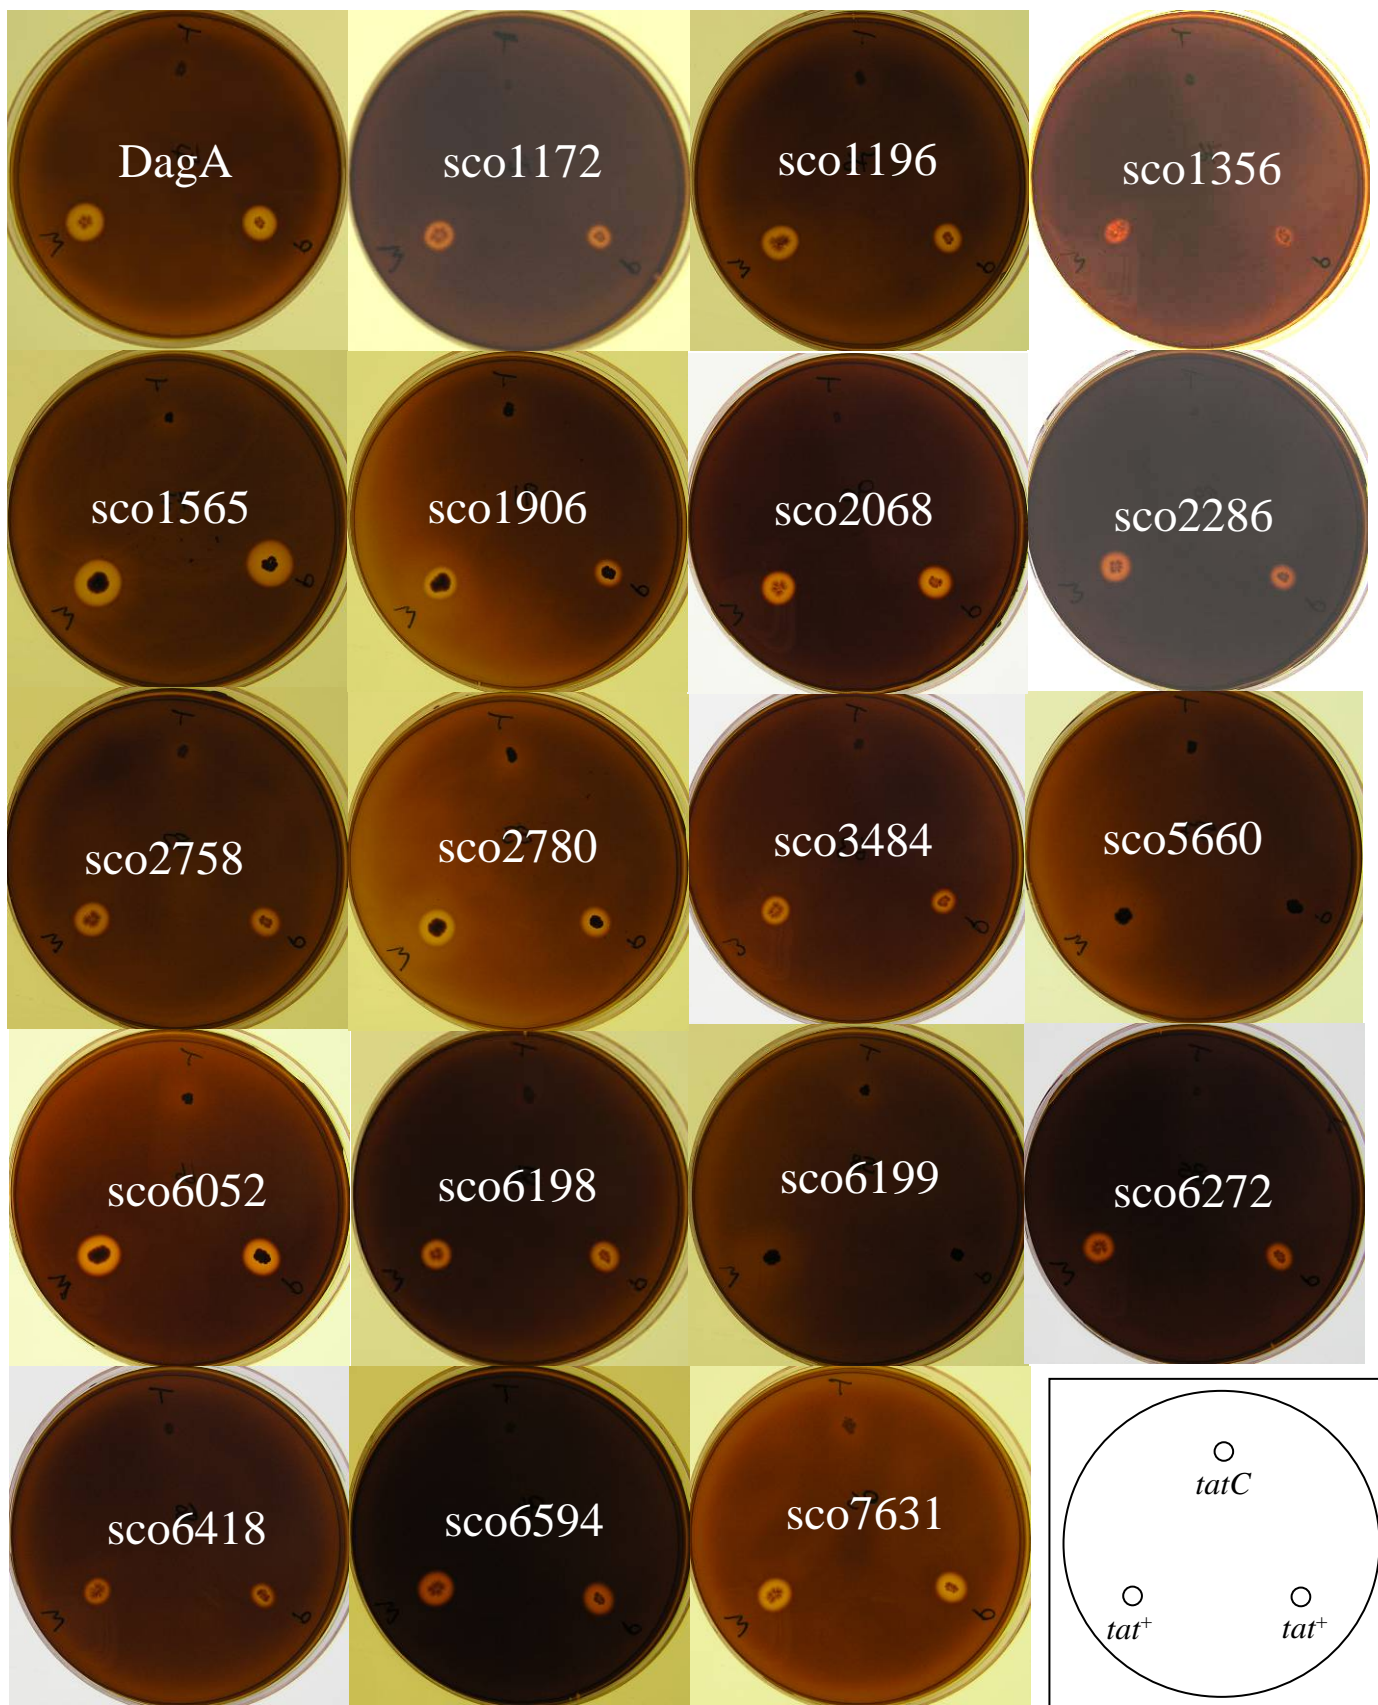

Supplement: pnas_0607025103_3.pdf [file pnas_0607025103_3.pdf]
